# Supplementary material for: The nuclear receptor REV-ERBα is implicated in the alteration of β-cell autophagy and survival under diabetogenic conditions
Source: PubMed Central journal article supplement (PMC9012816; doi:10.1038/s41419-022-04767-z), 2022-04-15

**Full and uncropped western blot for Figure 1A**

Lanes 1, 2 are on the figure

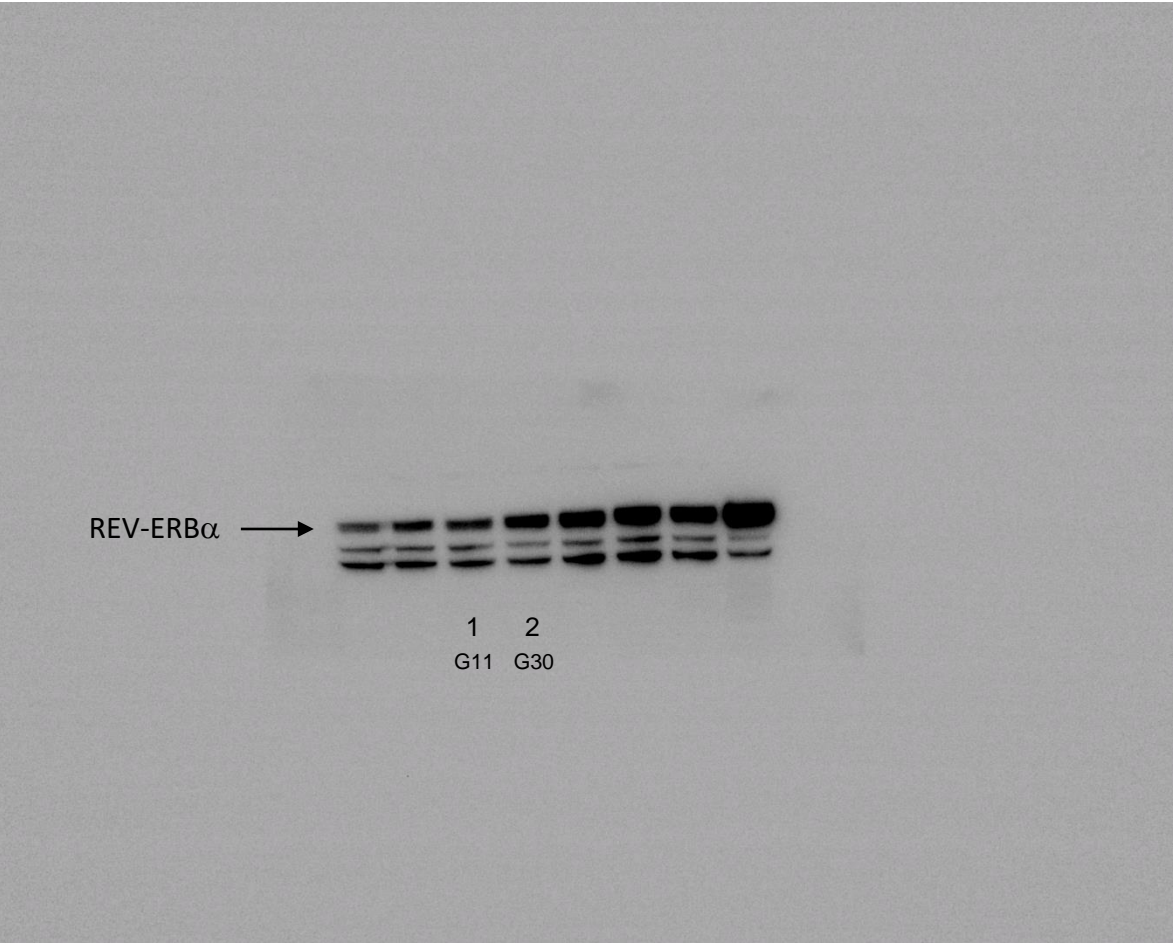

**Full and uncropped western blot for Figure 1A**

Lanes 1, 2 are on the figure

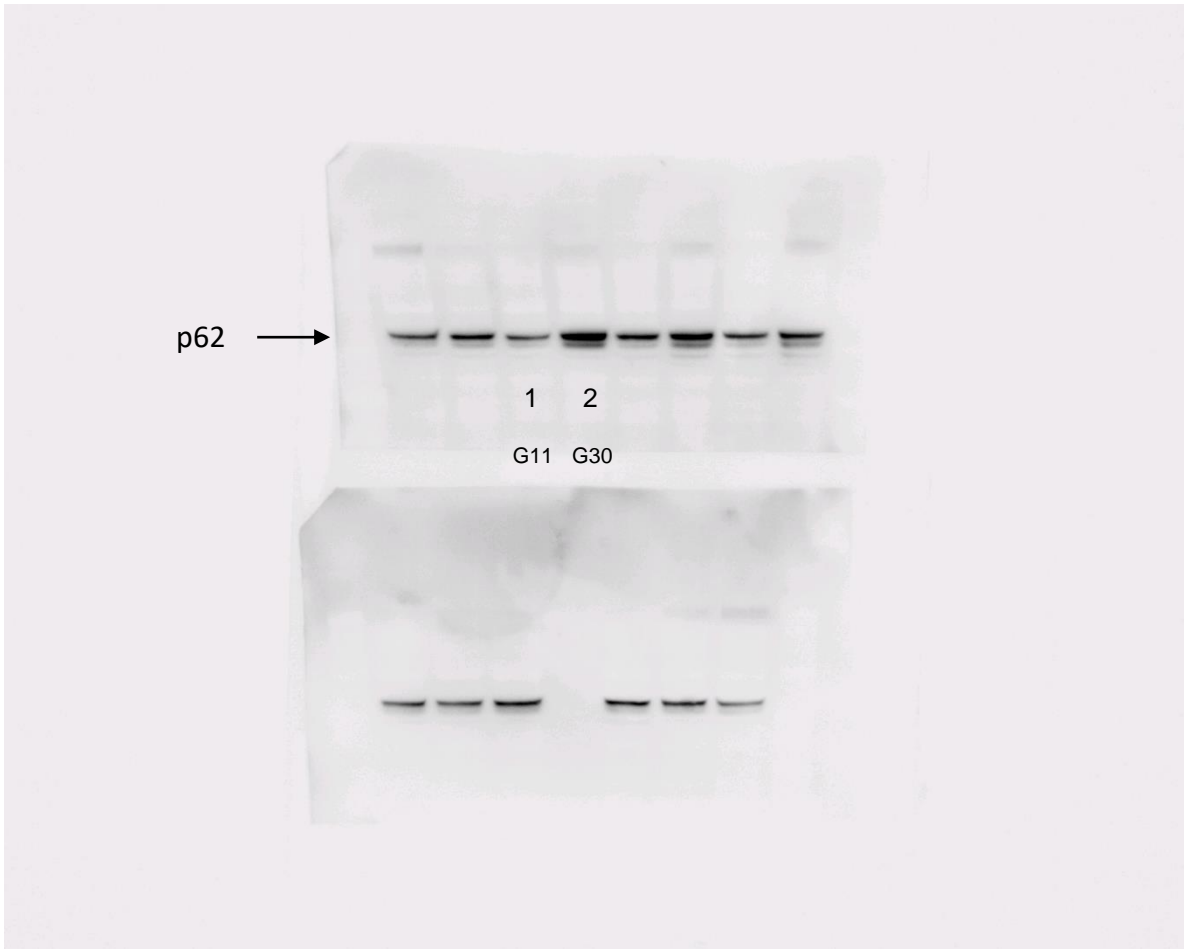

**Full and uncropped western blot for Figure 1A**

Lanes 1, 2 are on the figure

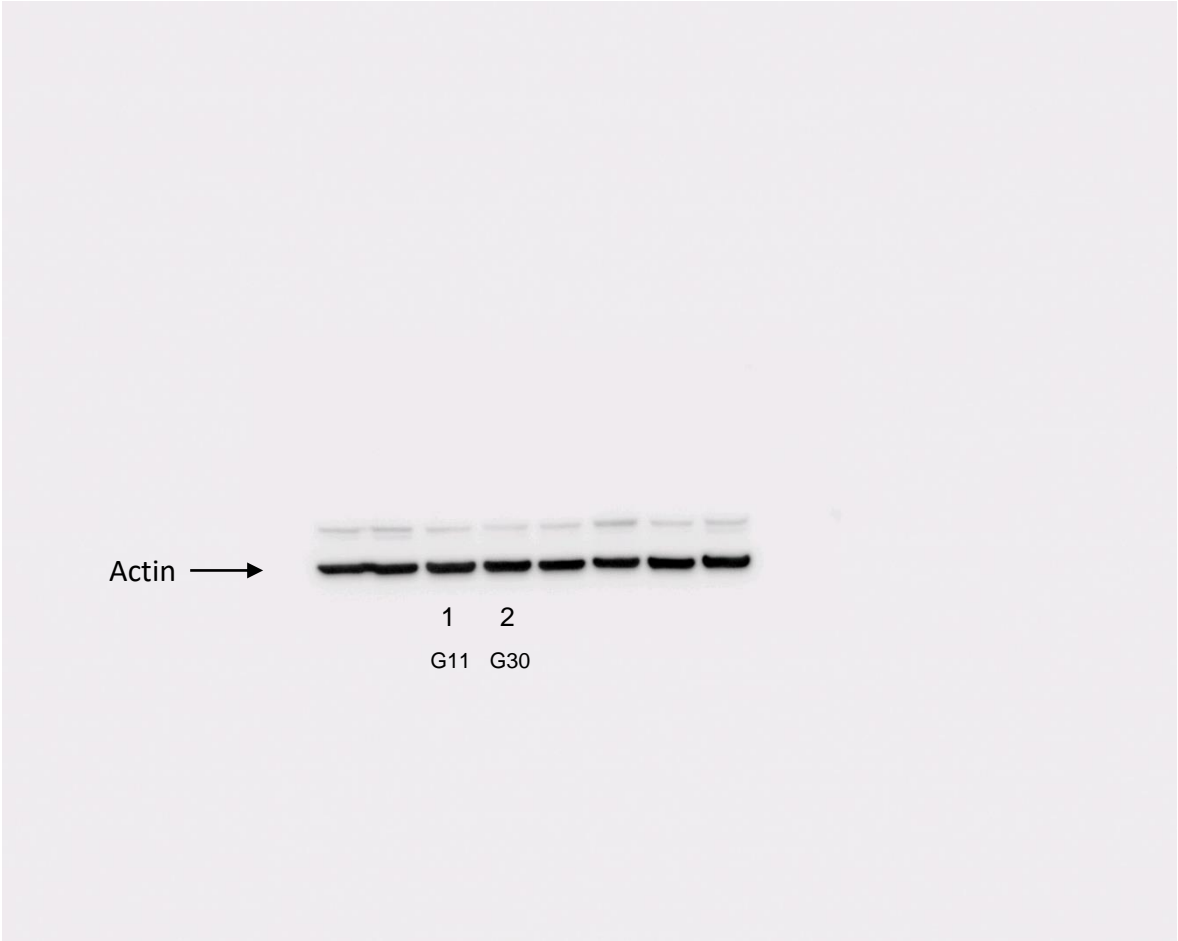

**Full and uncropped western blot for Figure 1A**

Lanes 1, 2 are on the figure

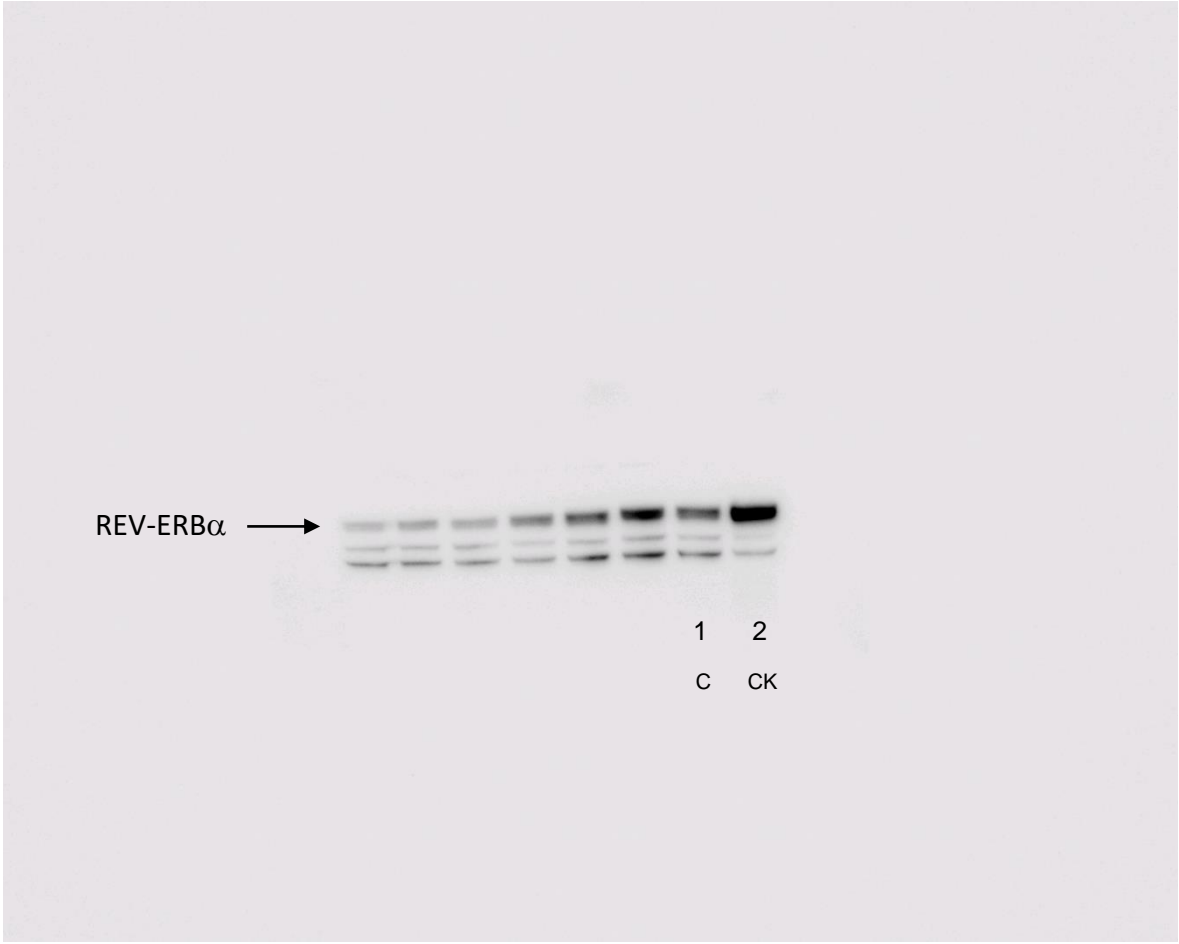

**Full and uncropped western blot for Figure 1A**

Lanes 1, 2 are on the figure

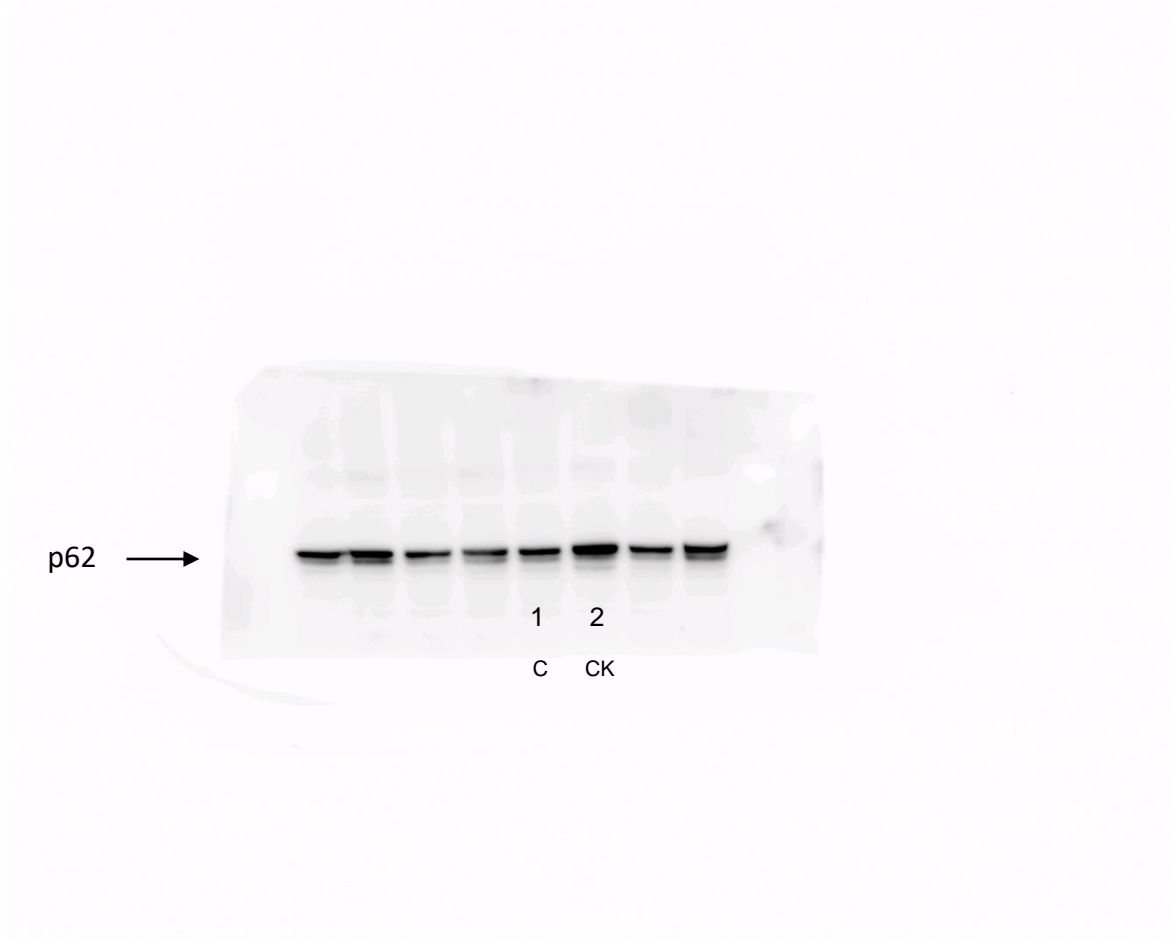

**Full and uncropped western blot for Figure 1A**

Lanes 1, 2 are on the figure

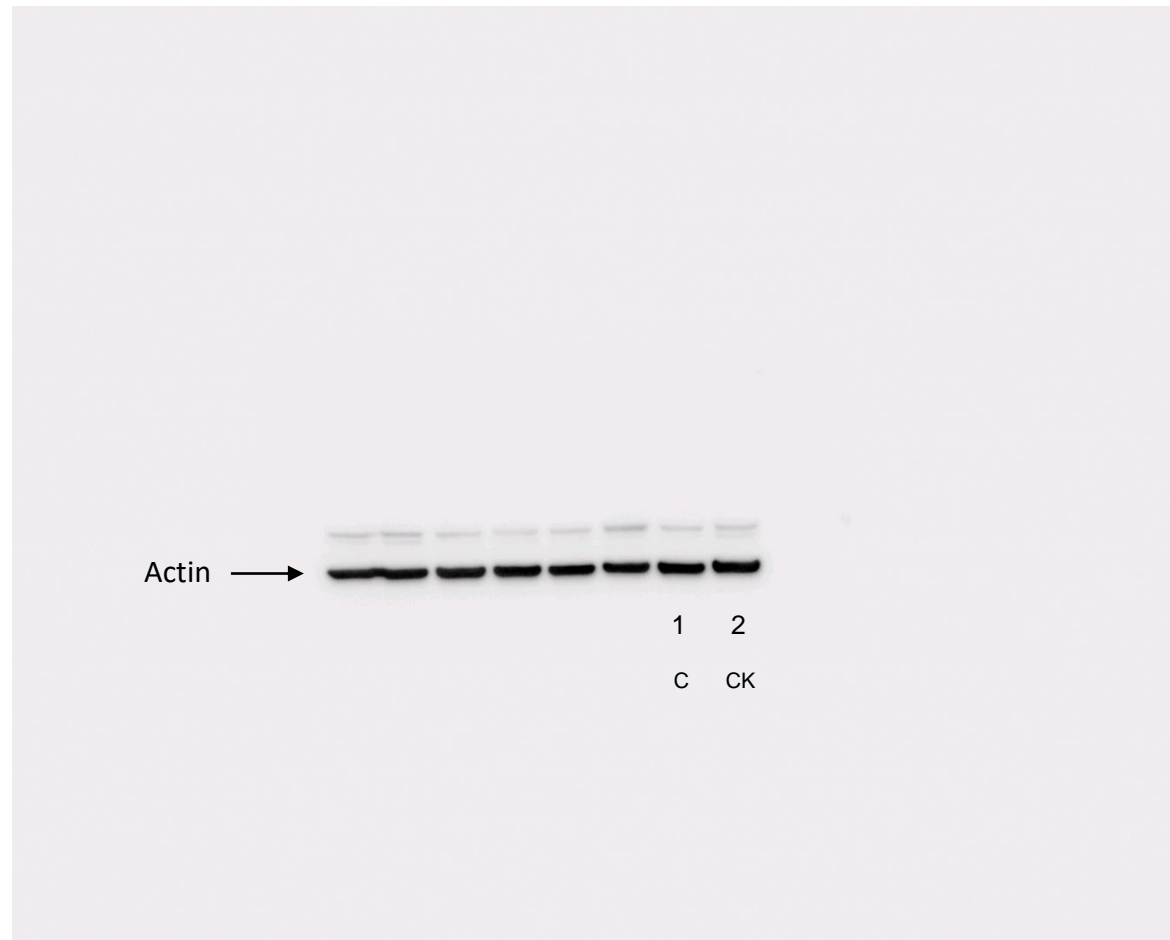

Full and uncropped western blot for Figure 1C

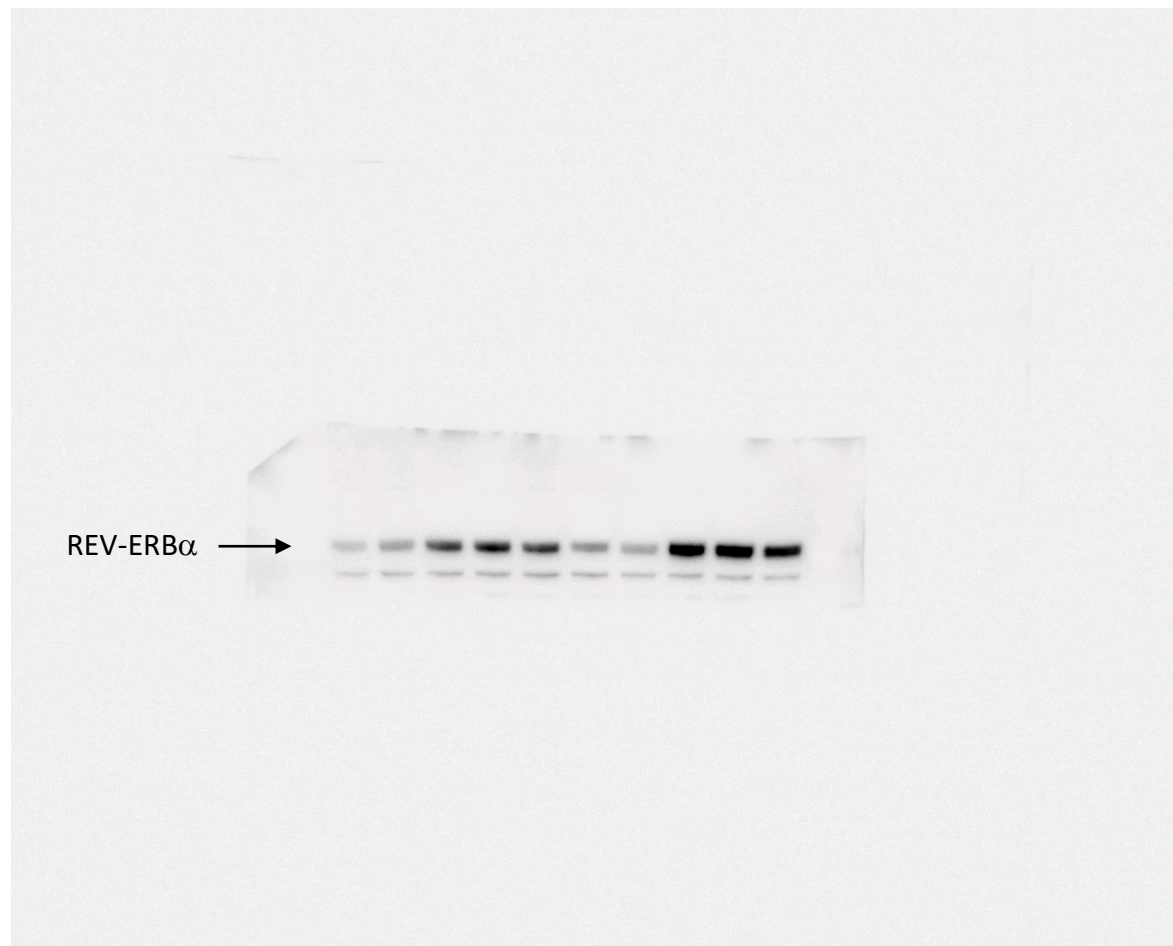

Full and uncropped western blot for Figure 1C

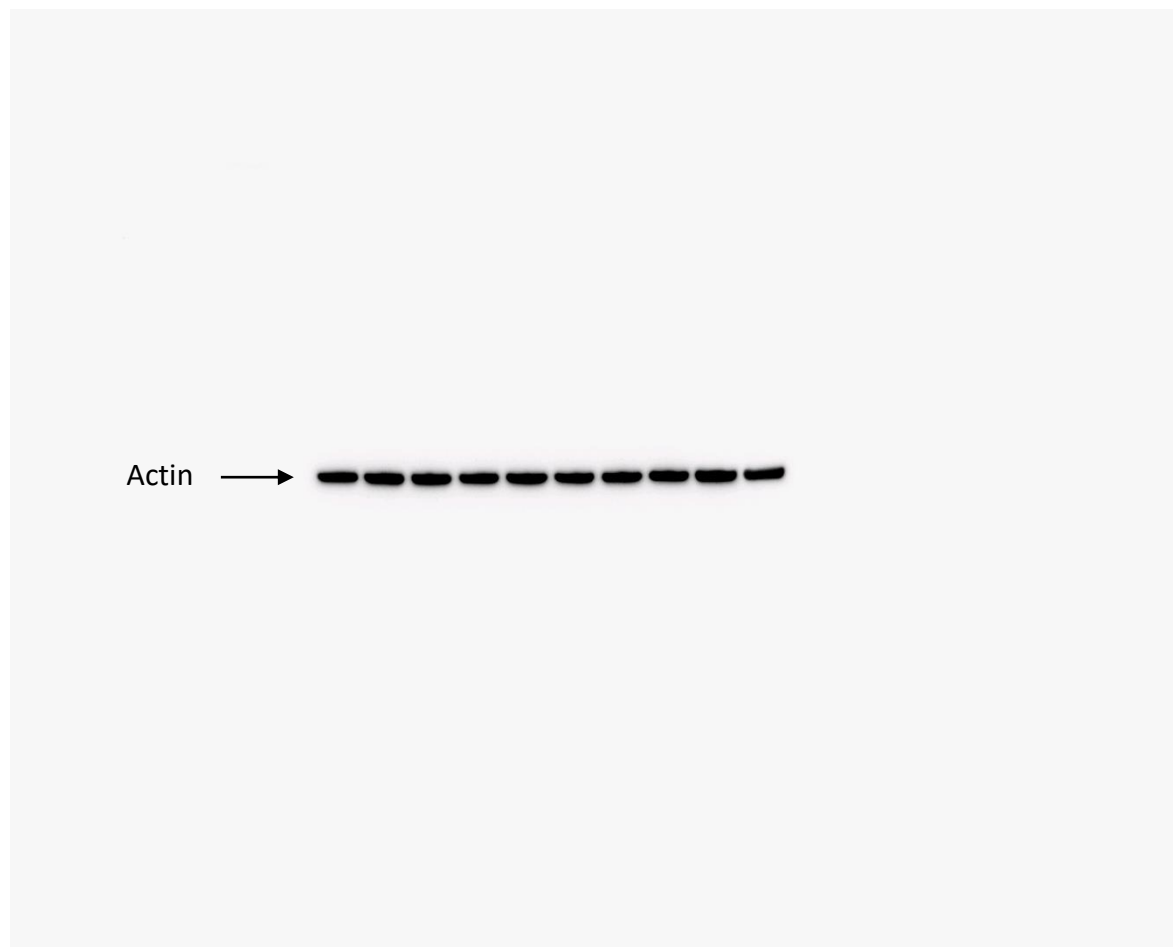



**Full and uncropped western blot for Figure 2A**

Lanes 1, 2, 3 are on the figure

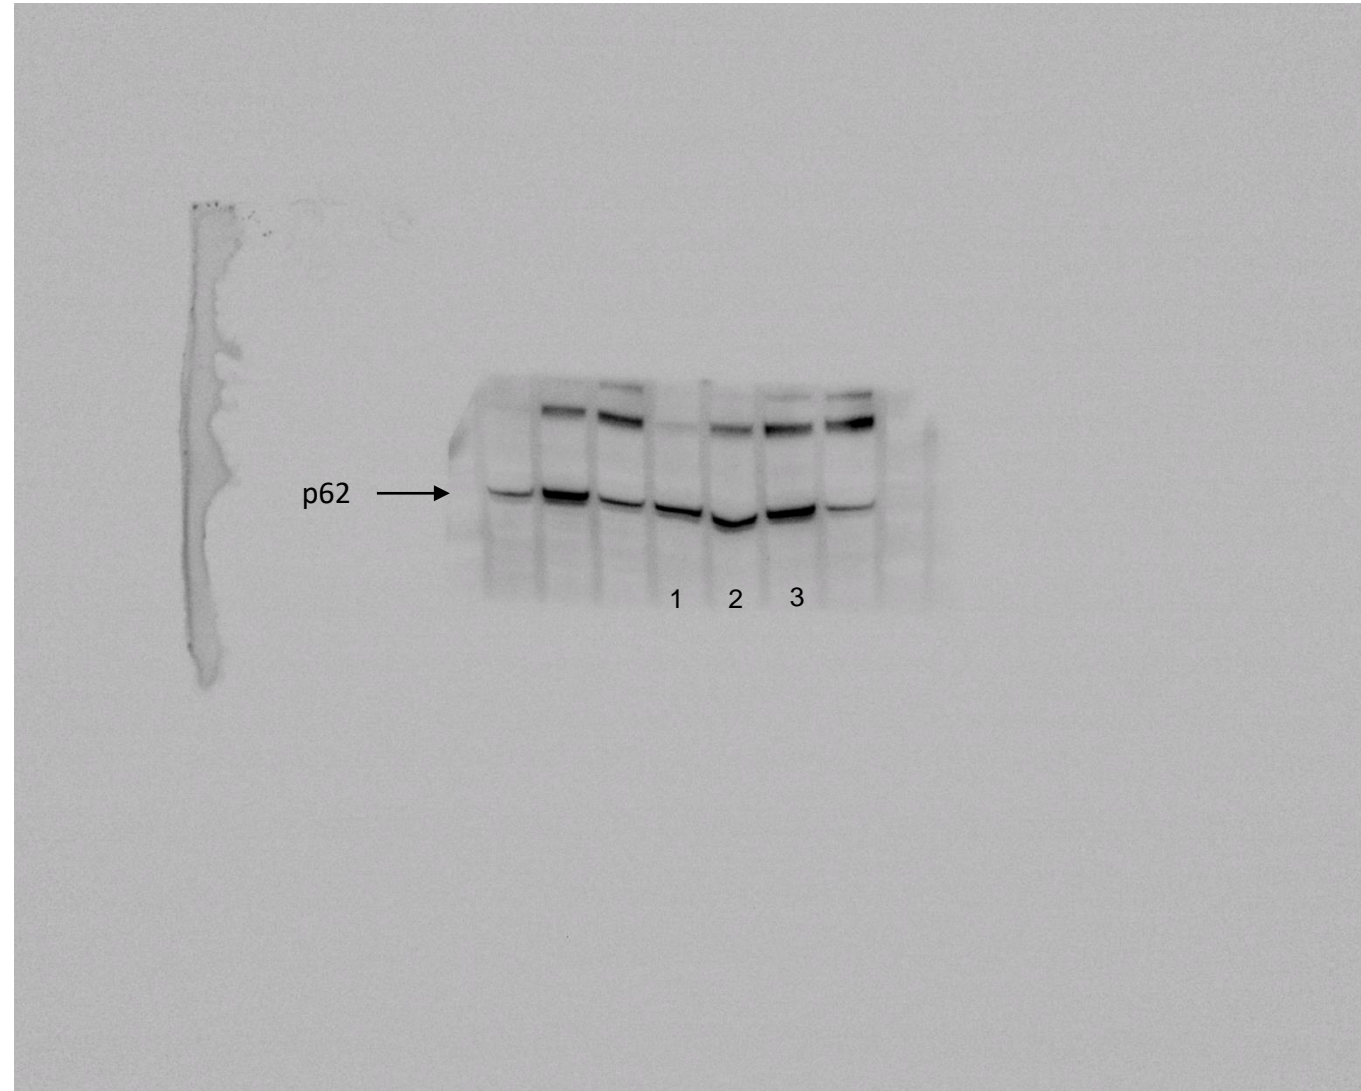

**Full and uncropped western blot for Figure 2A**

Lanes 1, 2, 3 are on the figure

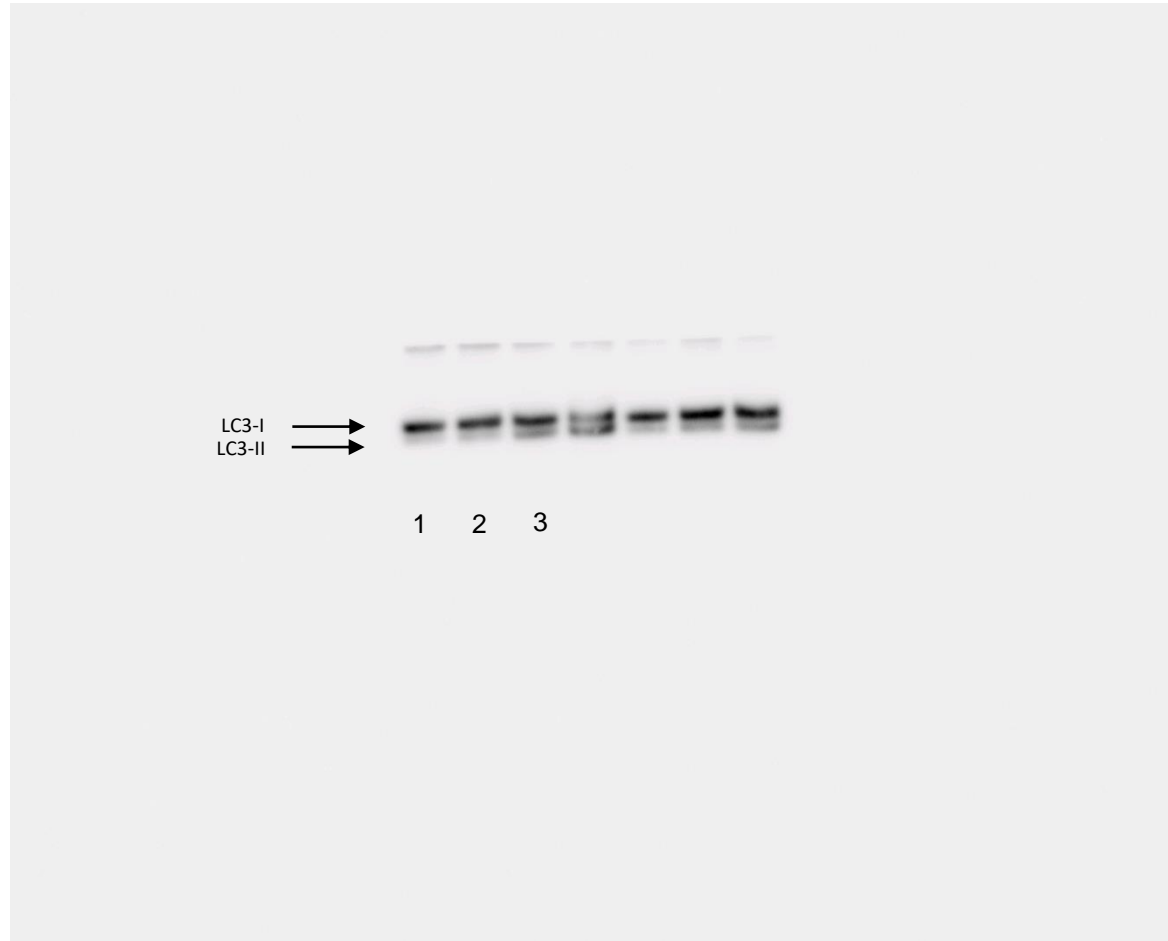

**Full and uncropped western blot for Figure 2A**

Lanes 1, 2, 3 are on the figure

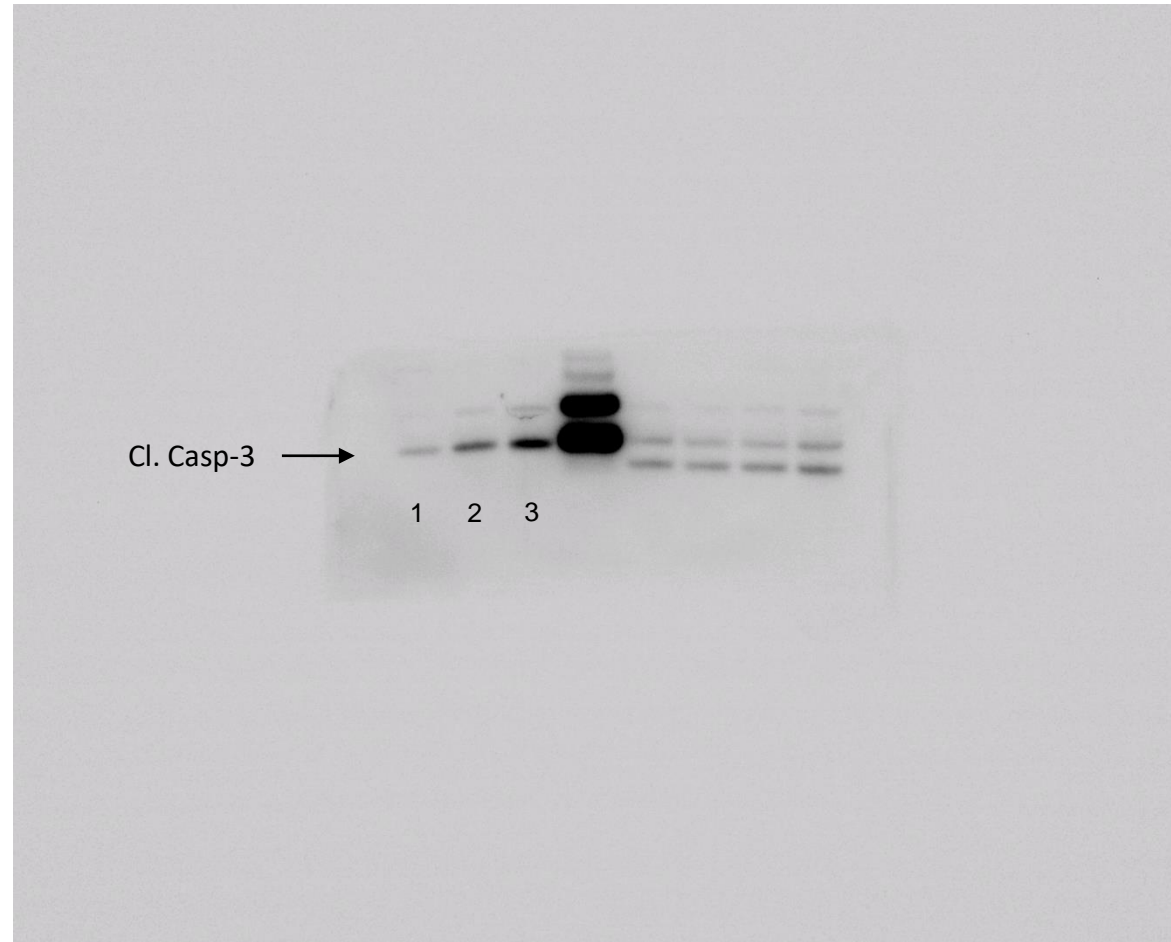

**Full and uncropped western blot for Figure 2A**

Lanes 1, 2, 3 are on the figure

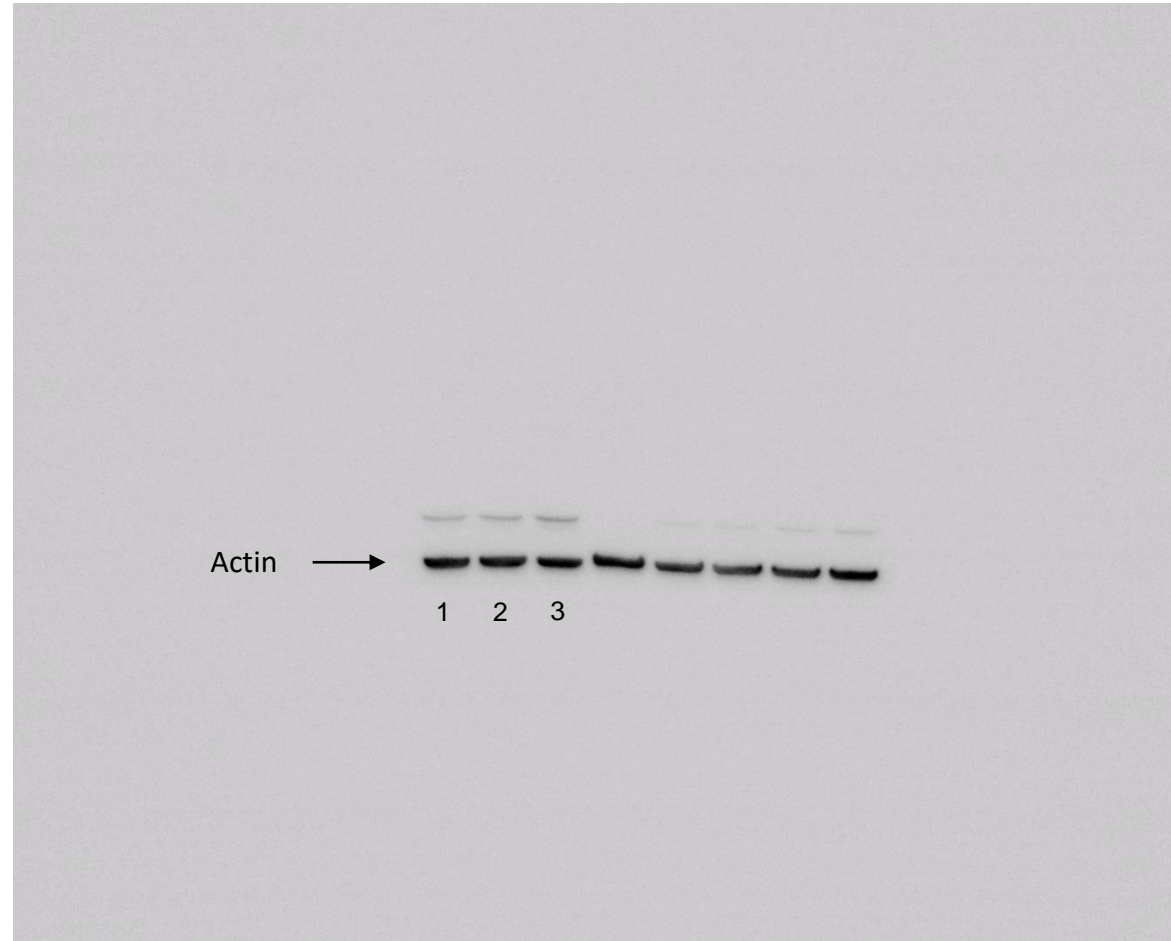

Full and uncropped western blot for Figure 2C

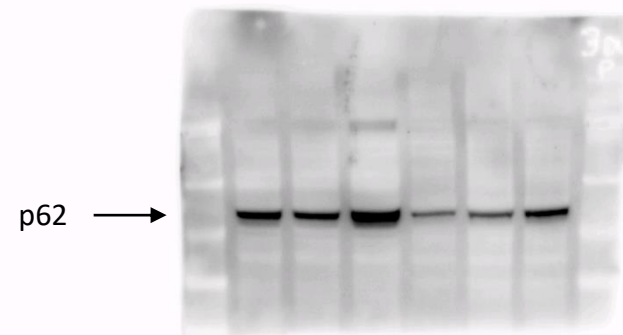

**Full and uncropped western blot for Figure 4A**

Lanes 1, 2 are on the figure

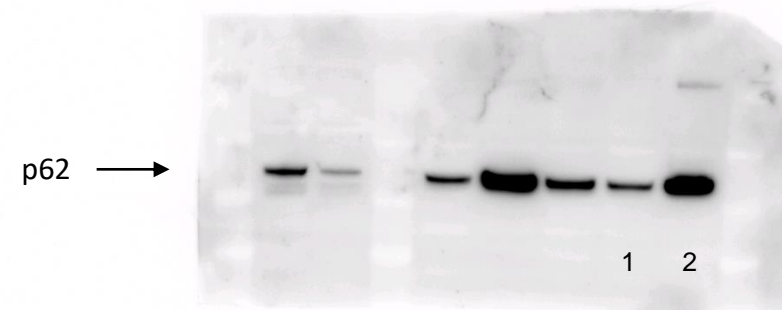

**Full and uncropped western blot for Figure 4A**

Lanes 1, 2 are on the figure

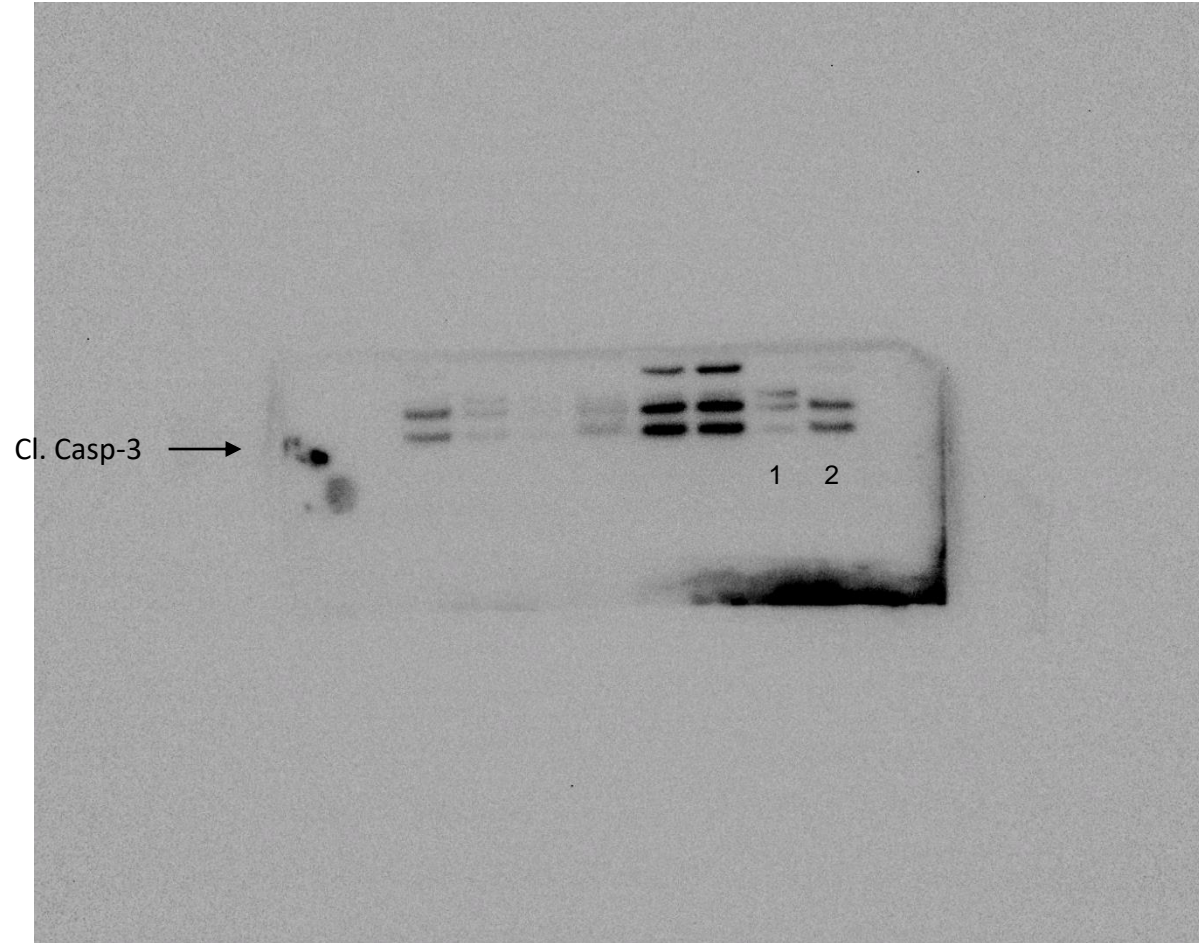

**Full and uncropped western blot for Figure 4A**

Lanes 1, 2 are on the figure

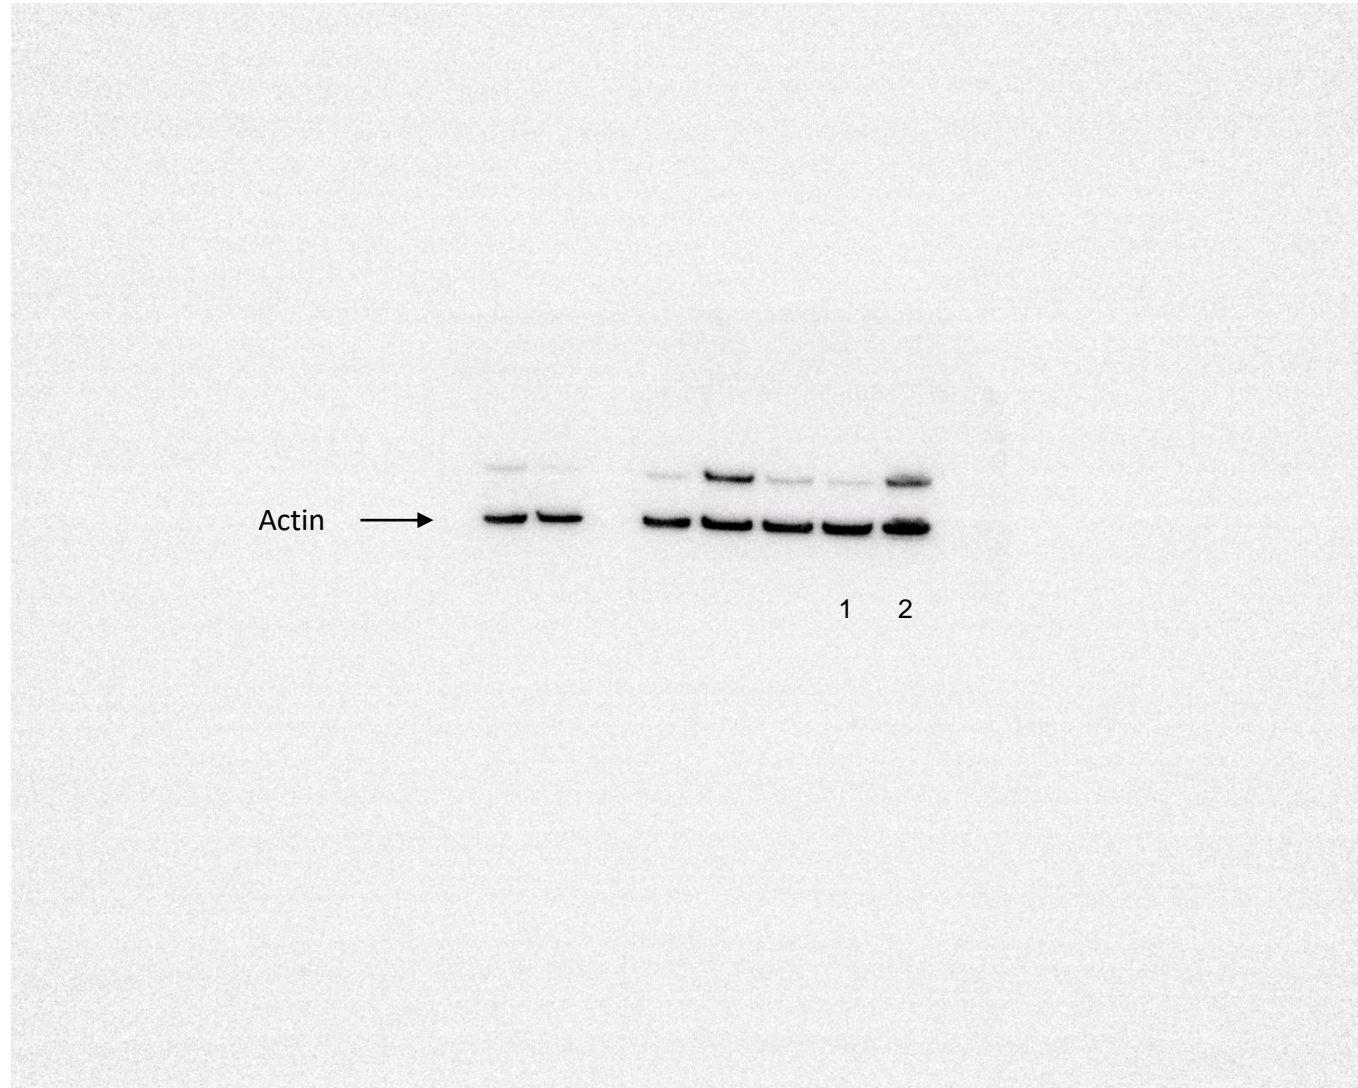



**Full and uncropped western blot for Figure 6A**

Lanes 1, 2, 3, 4 are on the figure

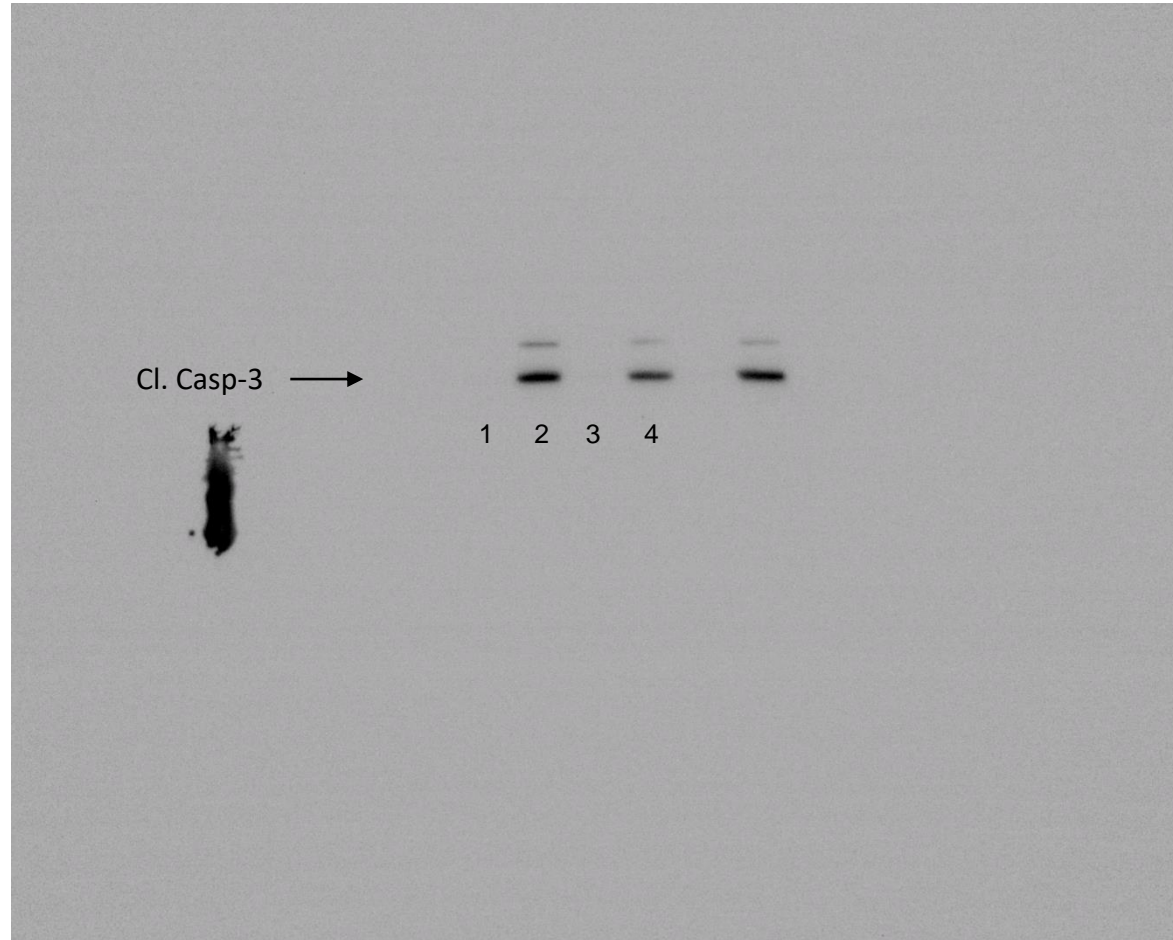

**Full and uncropped western blot for Figure 6A**

Lanes 1, 2, 3, 4 are on the figure

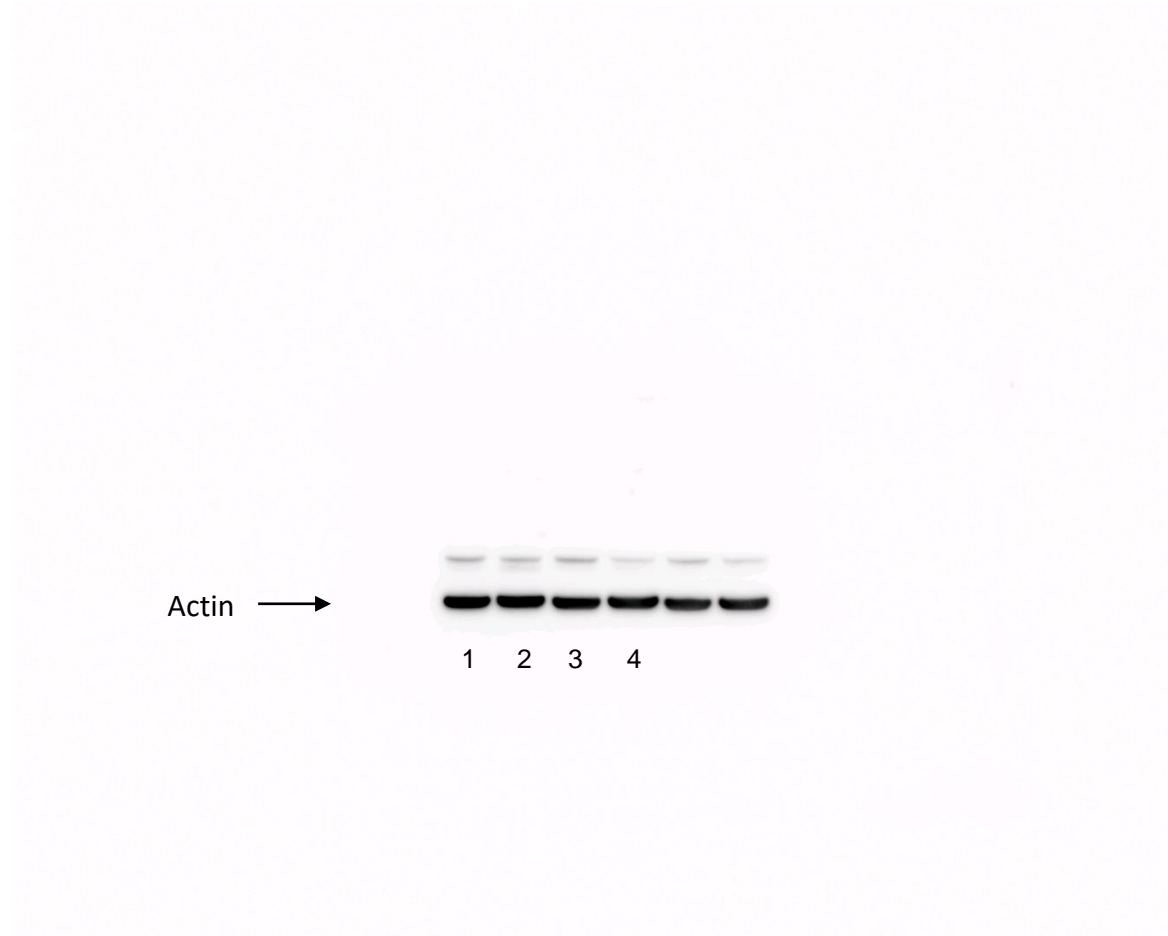

**Full and uncropped western blot for Figure 6B**

Lanes 1, 2, 3 are on the figure

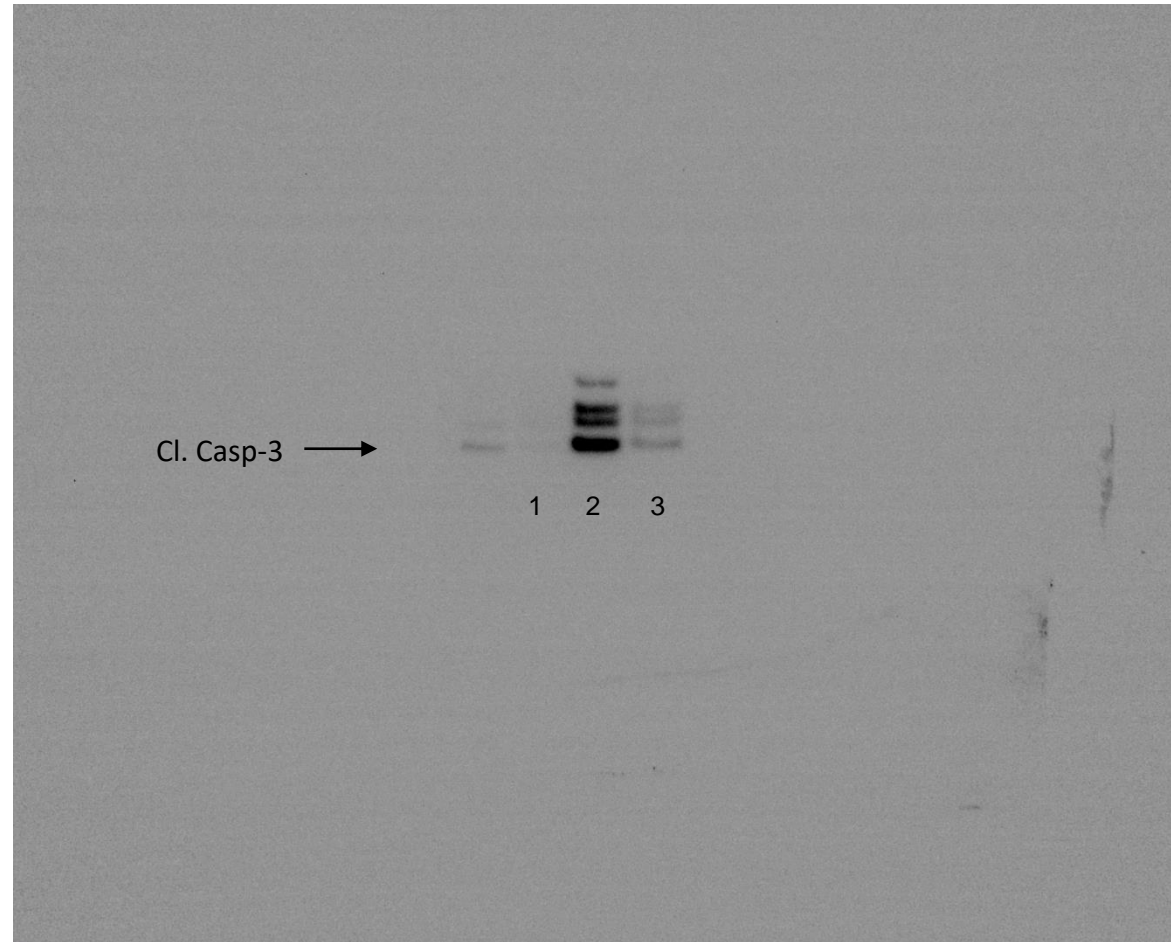

**Full and uncropped western blot for Figure 6B**

Lanes 1, 2, 3 are on the figure

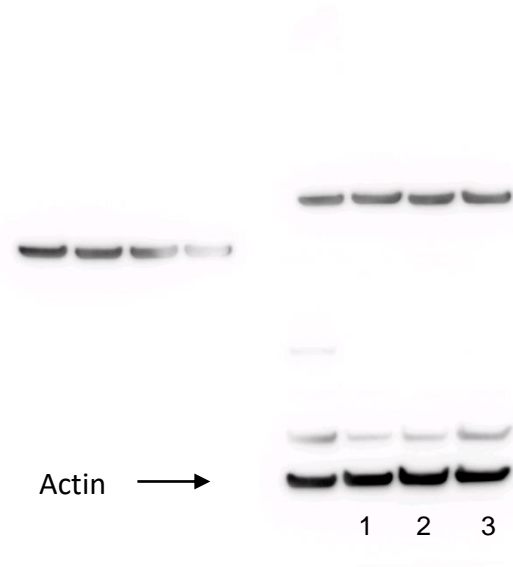

**Full and uncropped western blot for Figure 6C**

Lanes 1, 2, 3, 4 are on the figure

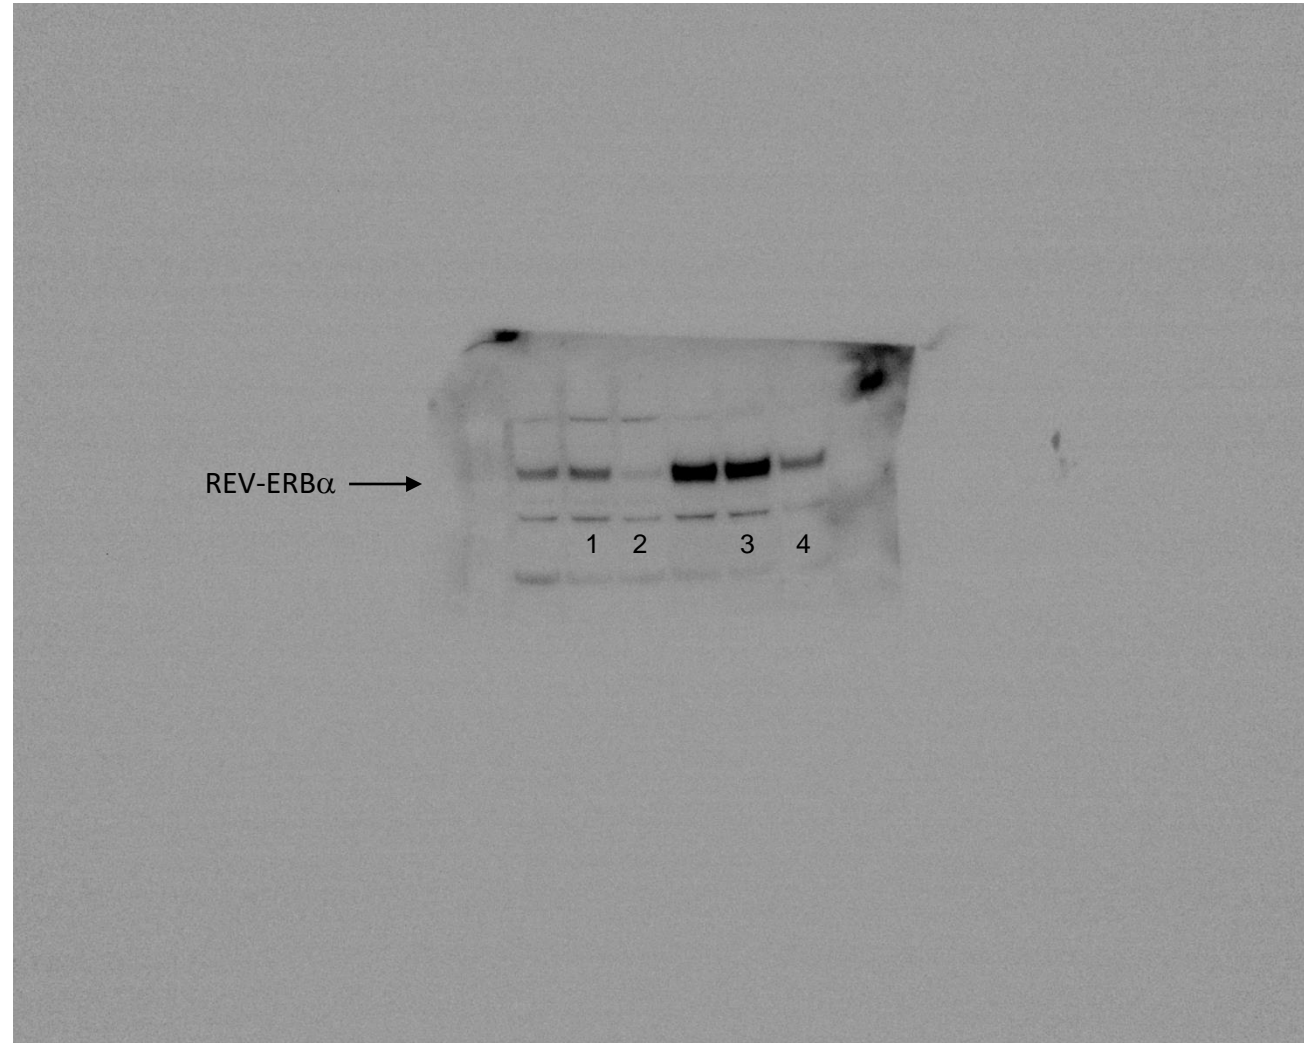

**Full and uncropped western blot for Figure 6C**

Lanes 1, 2, 3, 4 are on the figure

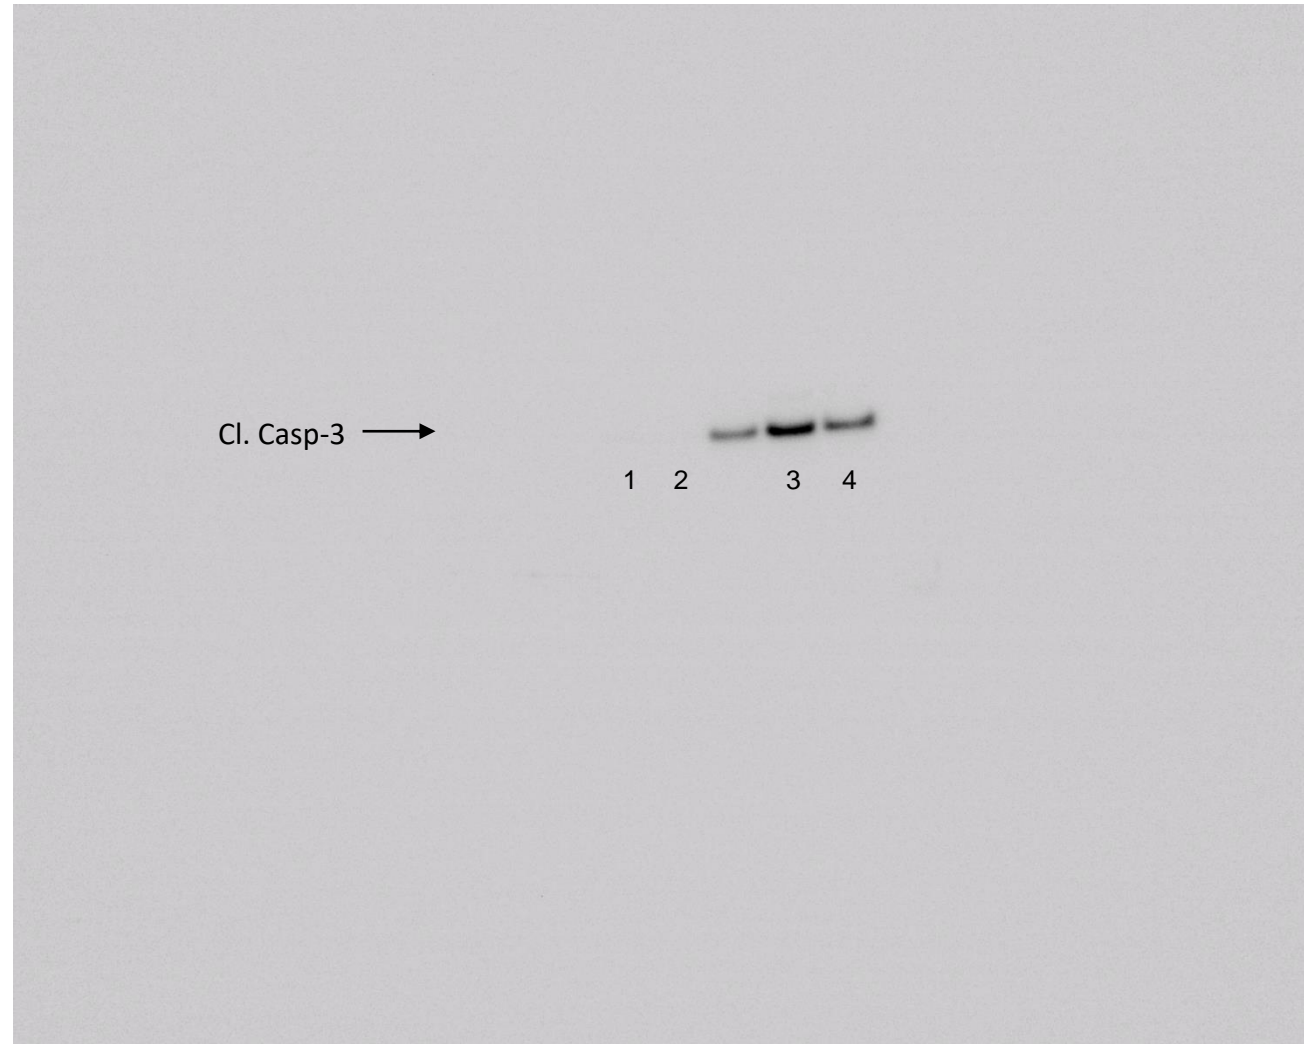

**Full and uncropped western blot for Figure 6C**

Lanes 1, 2, 3, 4 are on the figure

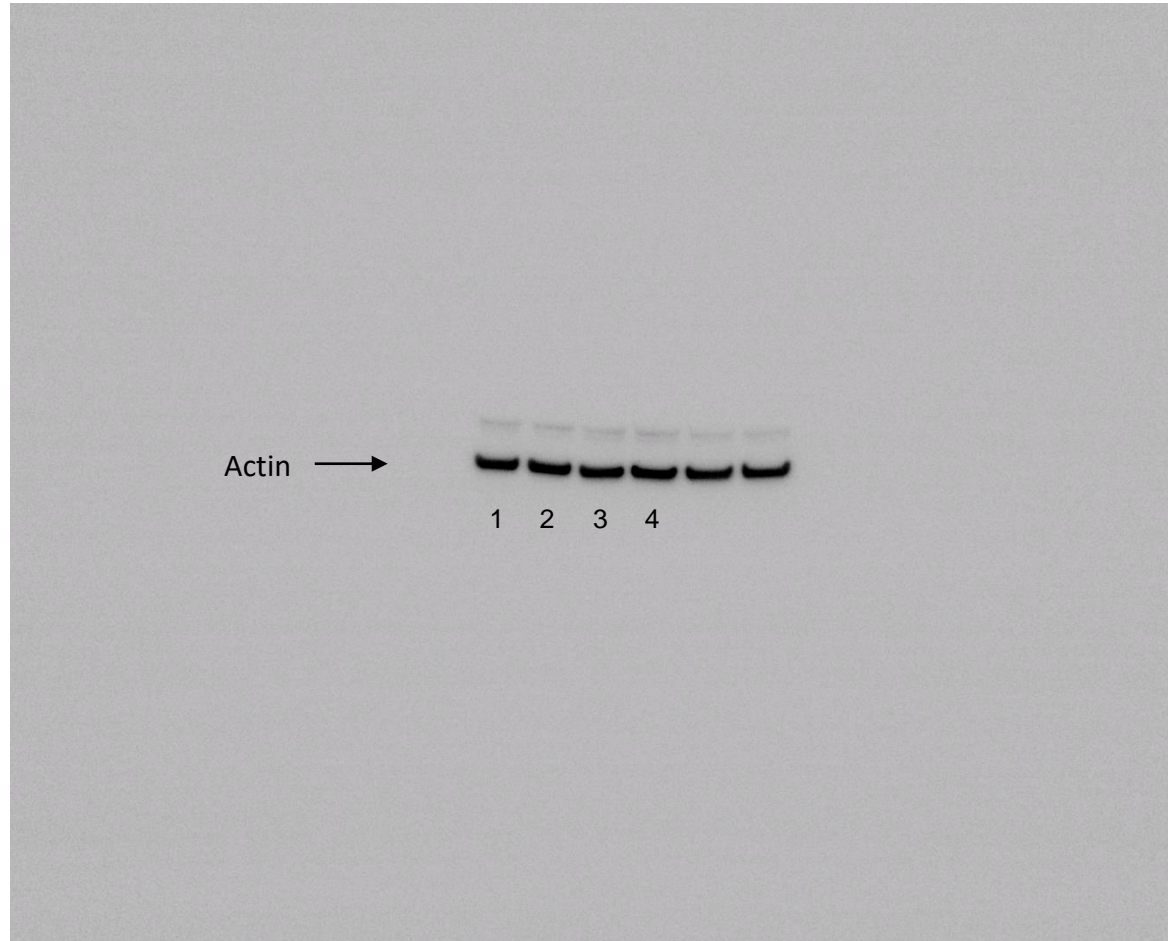

**Full and uncropped western blot for Figure 7A**

Lanes 1, 2, 3, 4 are on the figure

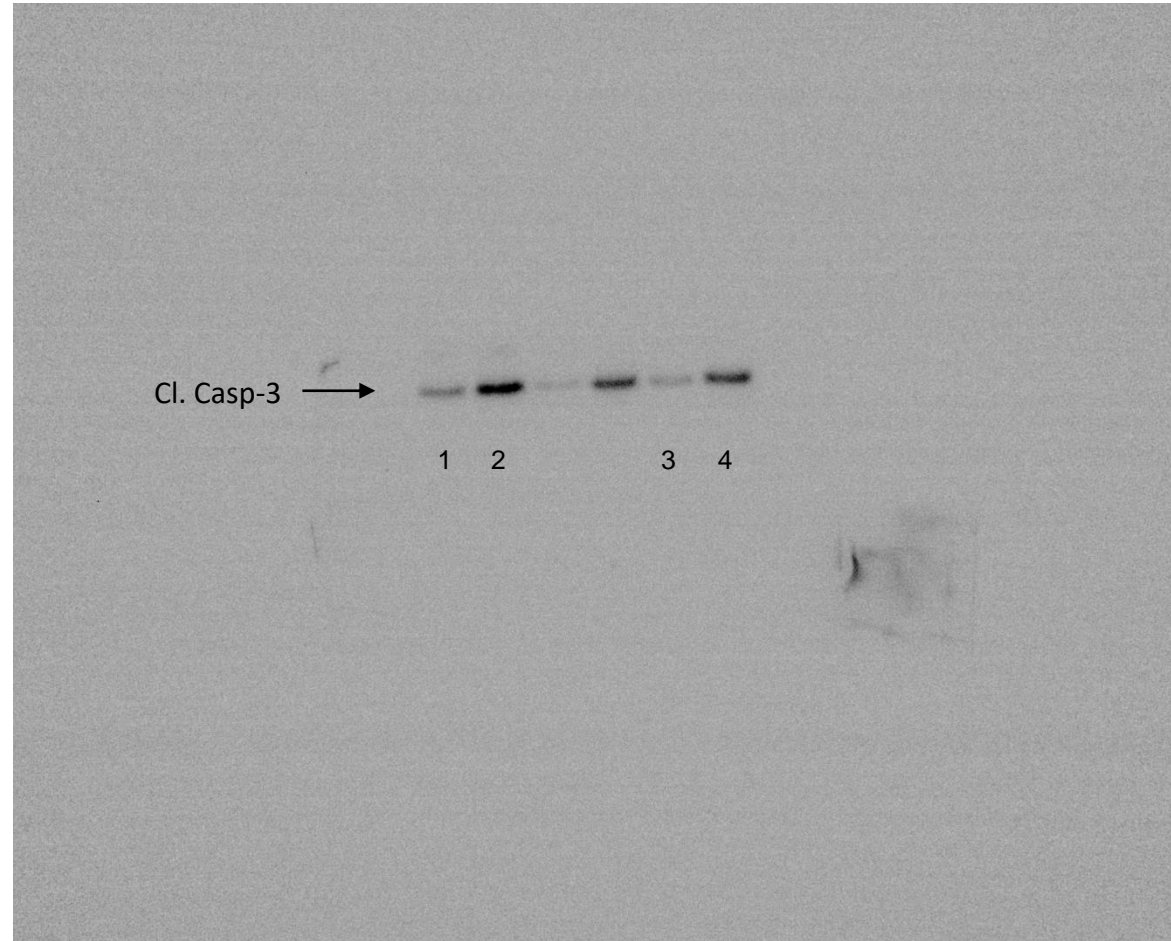



**Full and uncropped western blot for Figure 7A**

Lanes 1, 2, 3, 4 are on the figure

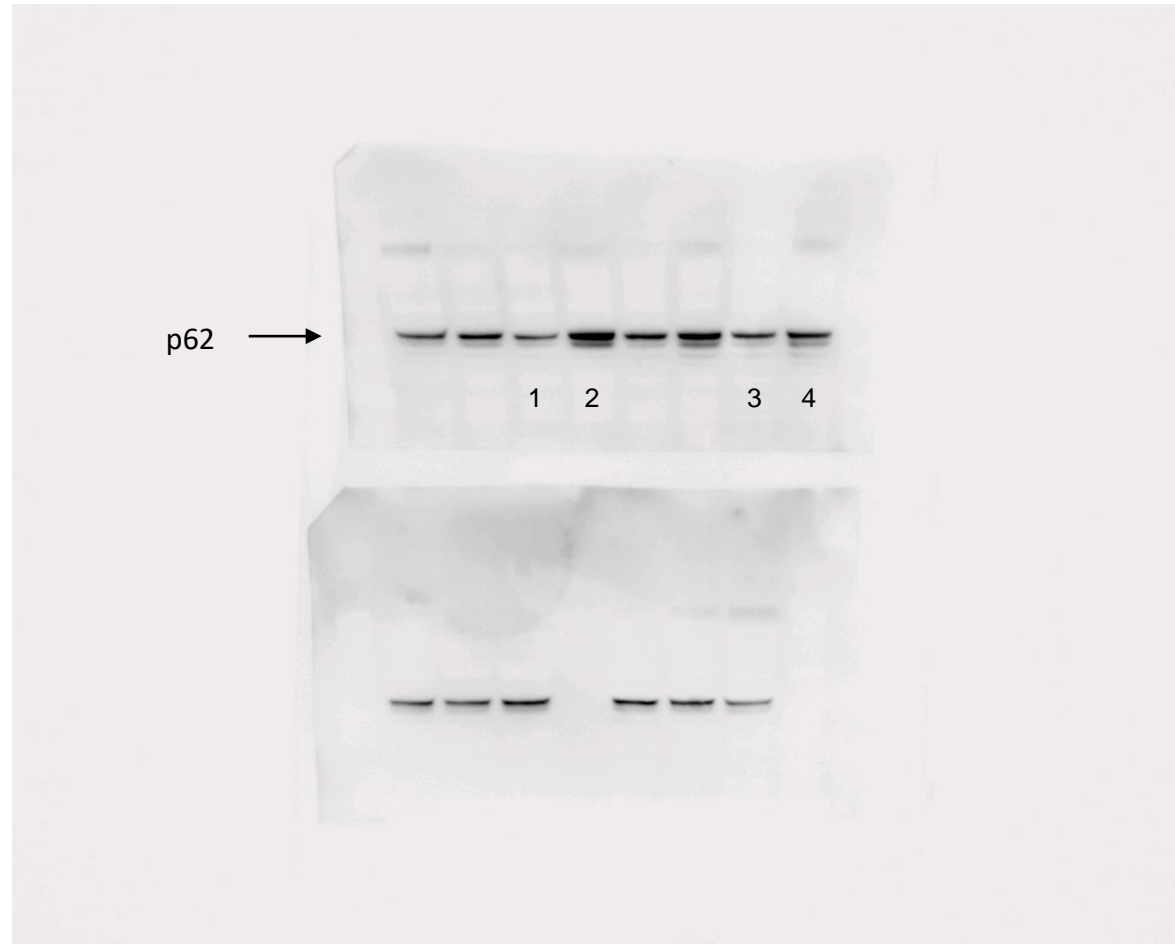

**Full and uncropped western blot for Figure 7A**

Lanes 1, 2, 3, 4 are on the figure

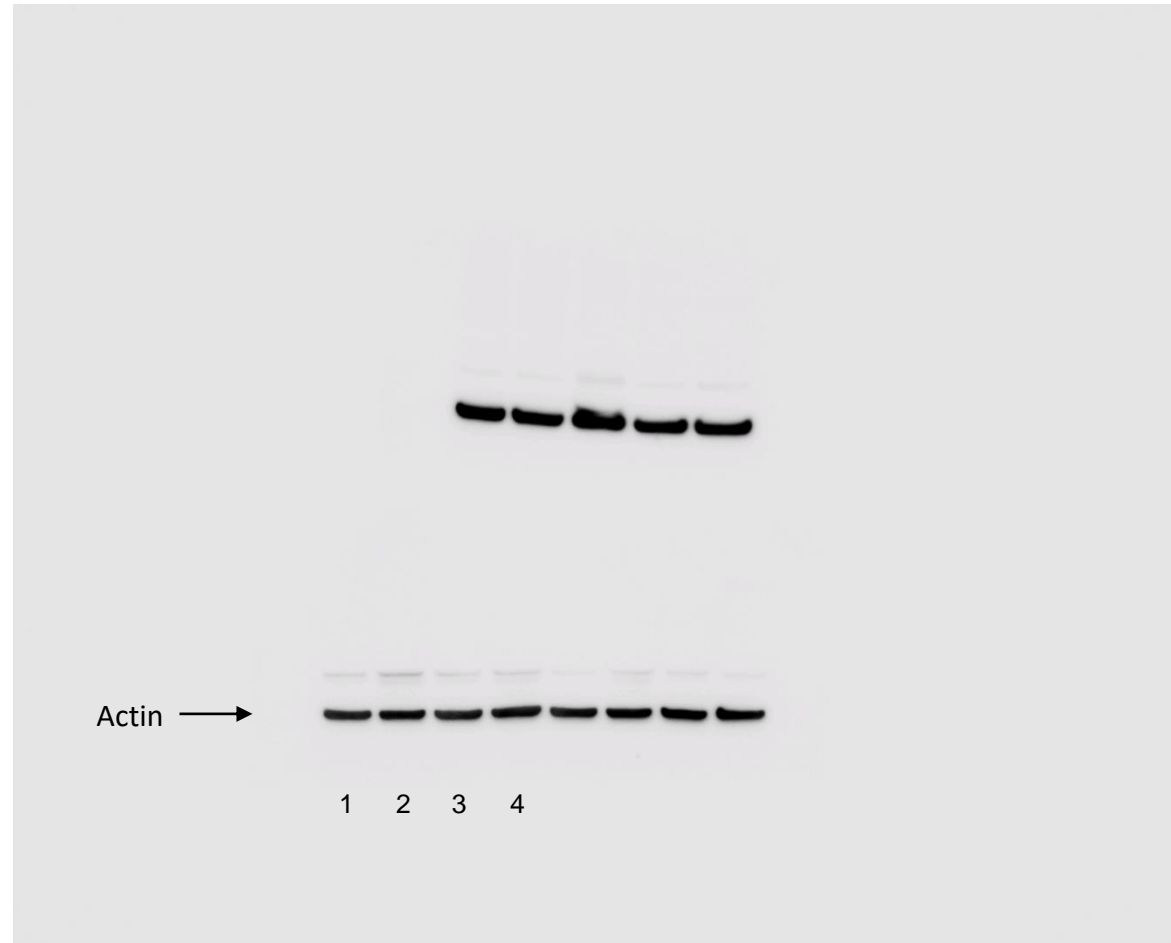

**Full and uncropped western blot for Figure 7B**

Lanes 1, 2, 3, 4 are on the figure

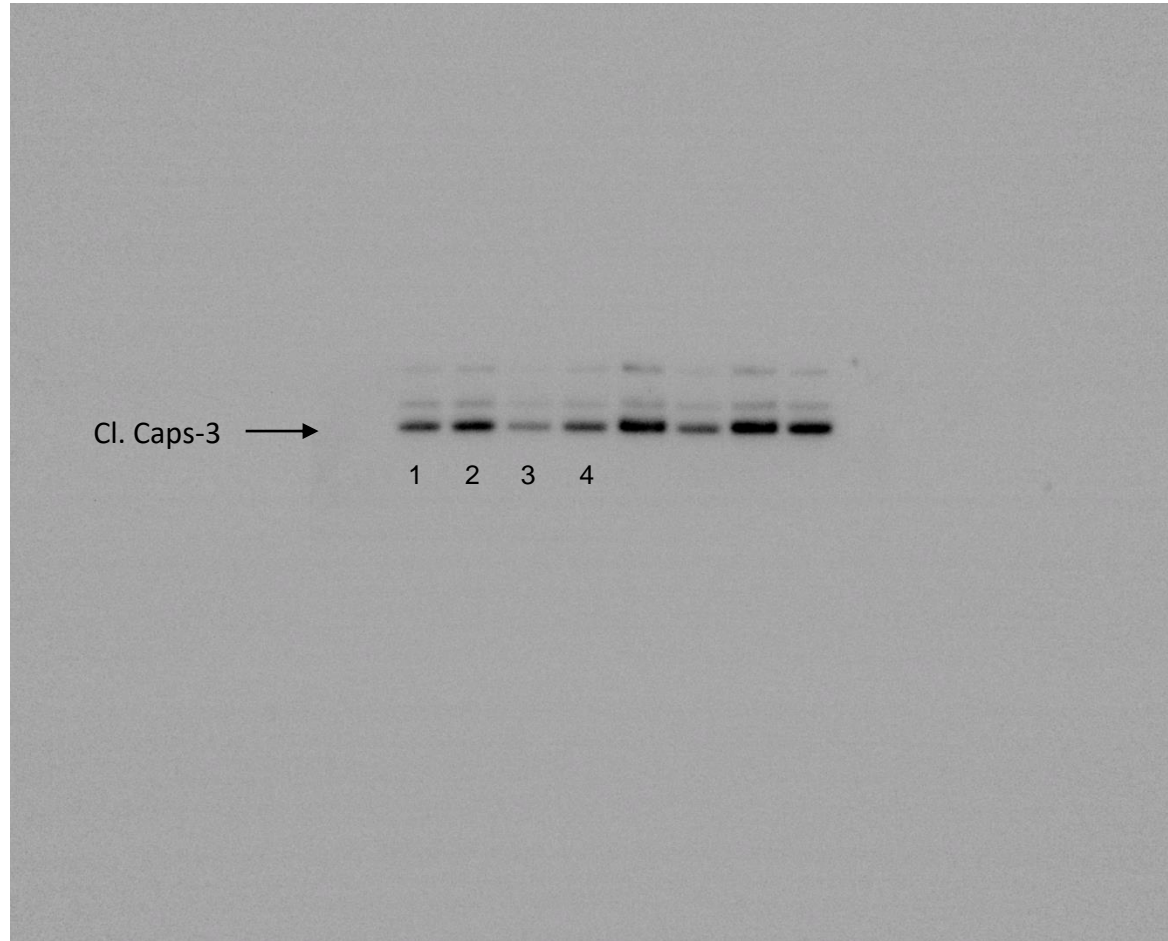

**Full and uncropped western blot for Figure 7B**

Lanes 1, 2, 3, 4 are on the figure

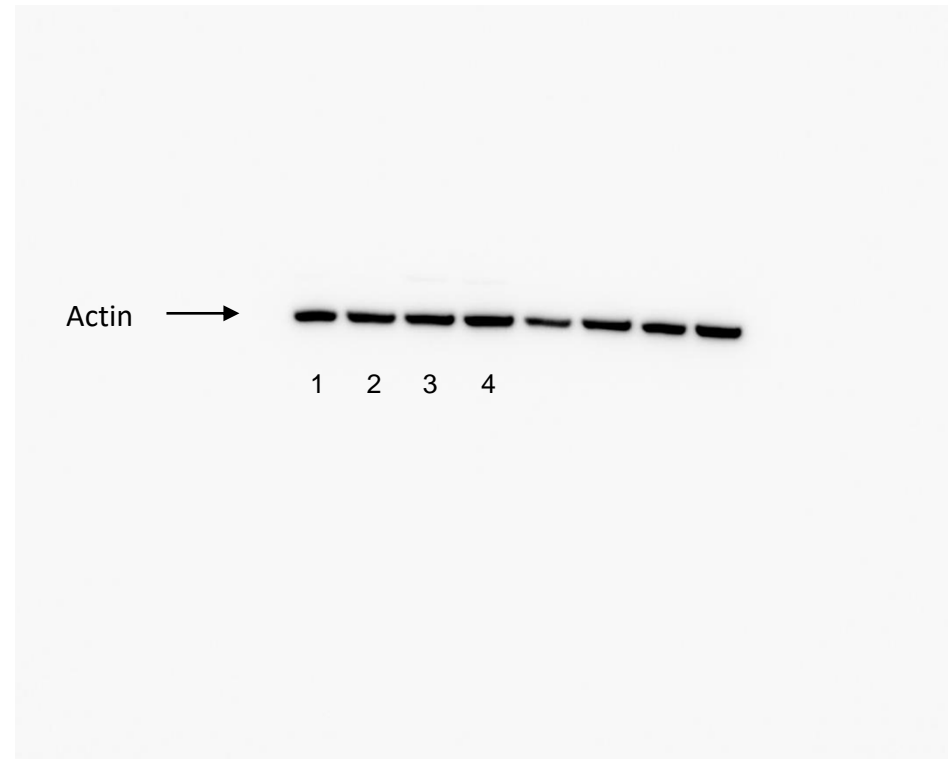

**Full and uncropped western blot for Figure 7C**

Lanes 1, 2, 3, 4 are on the figure

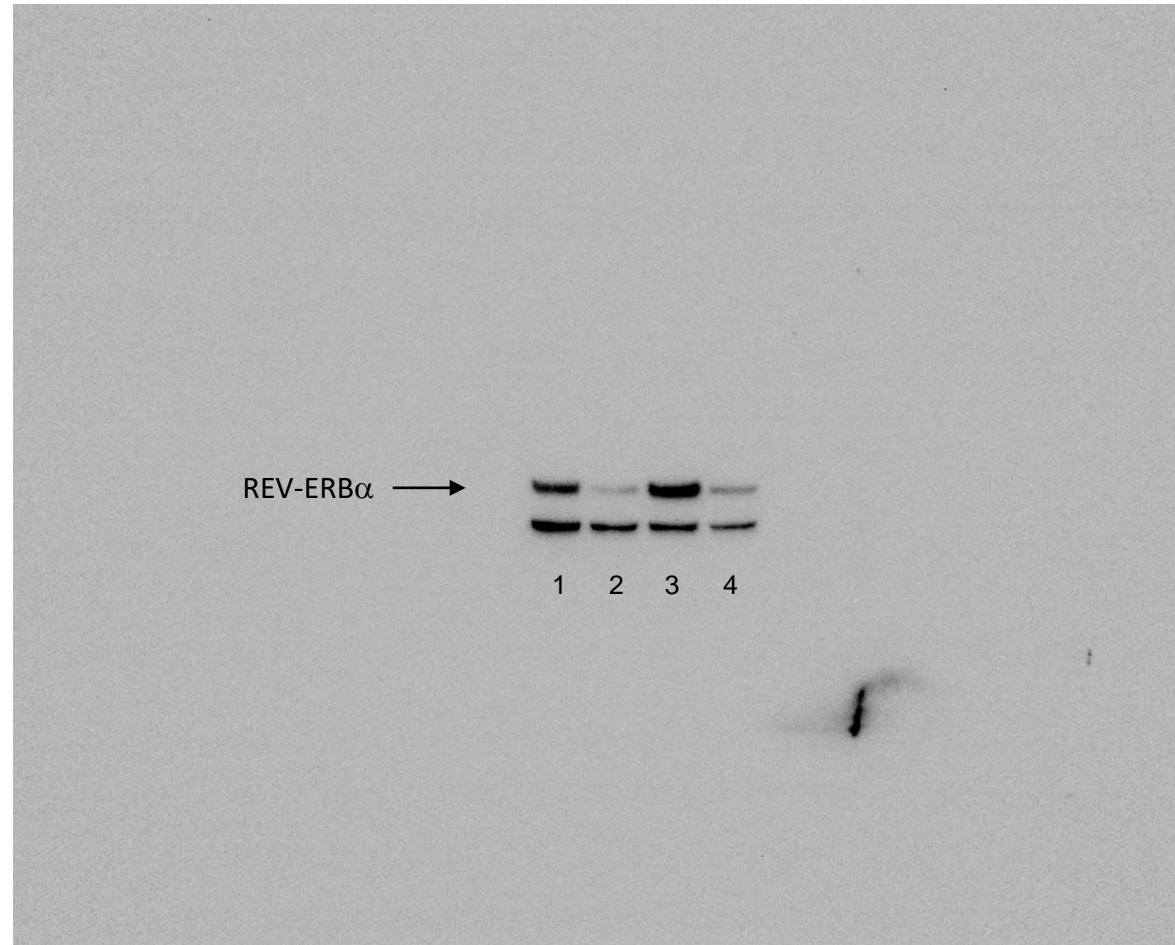

**Full and uncropped western blot for Figure 7C**

Lanes 1, 2, 3, 4 are on the figure

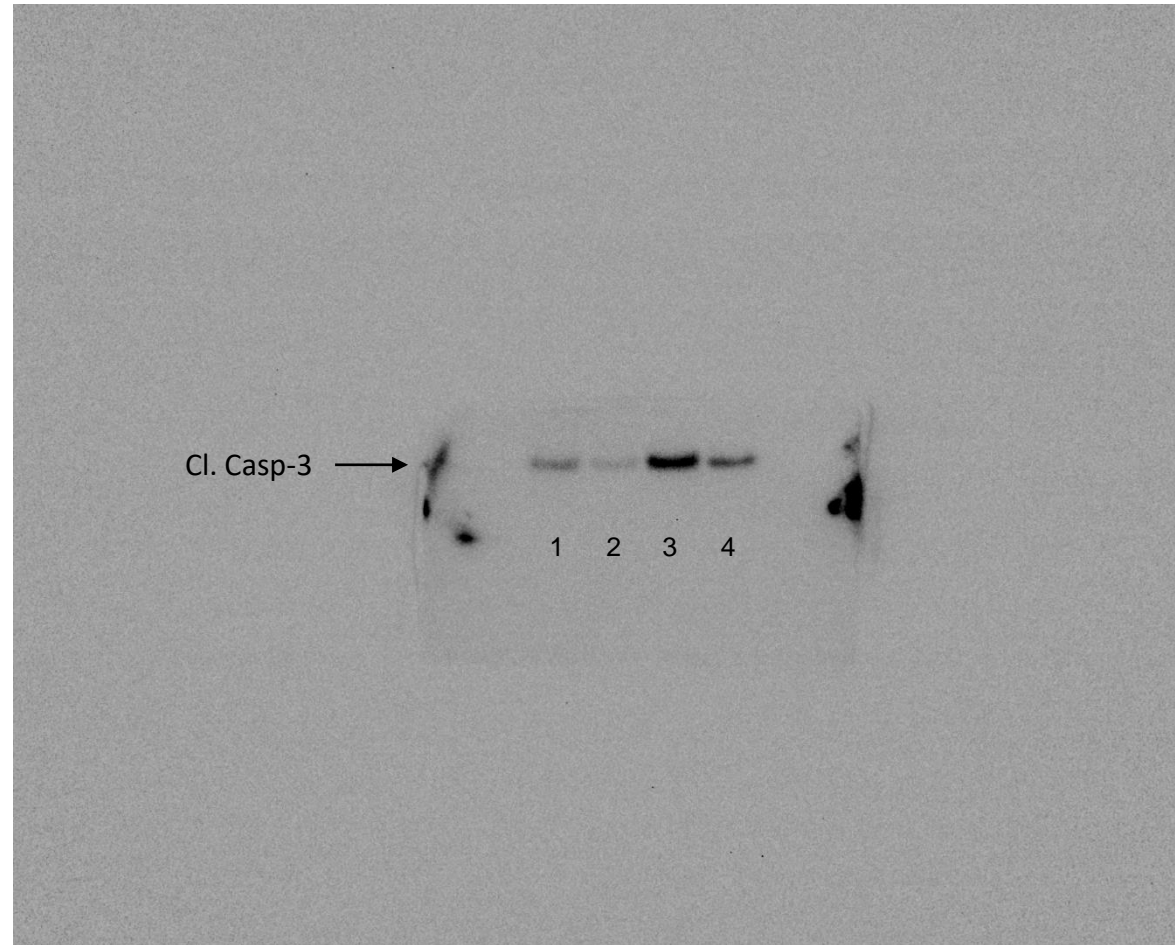

**Full and uncropped western blot for Figure 7C**

Lanes 1, 2, 3, 4 are on the figure

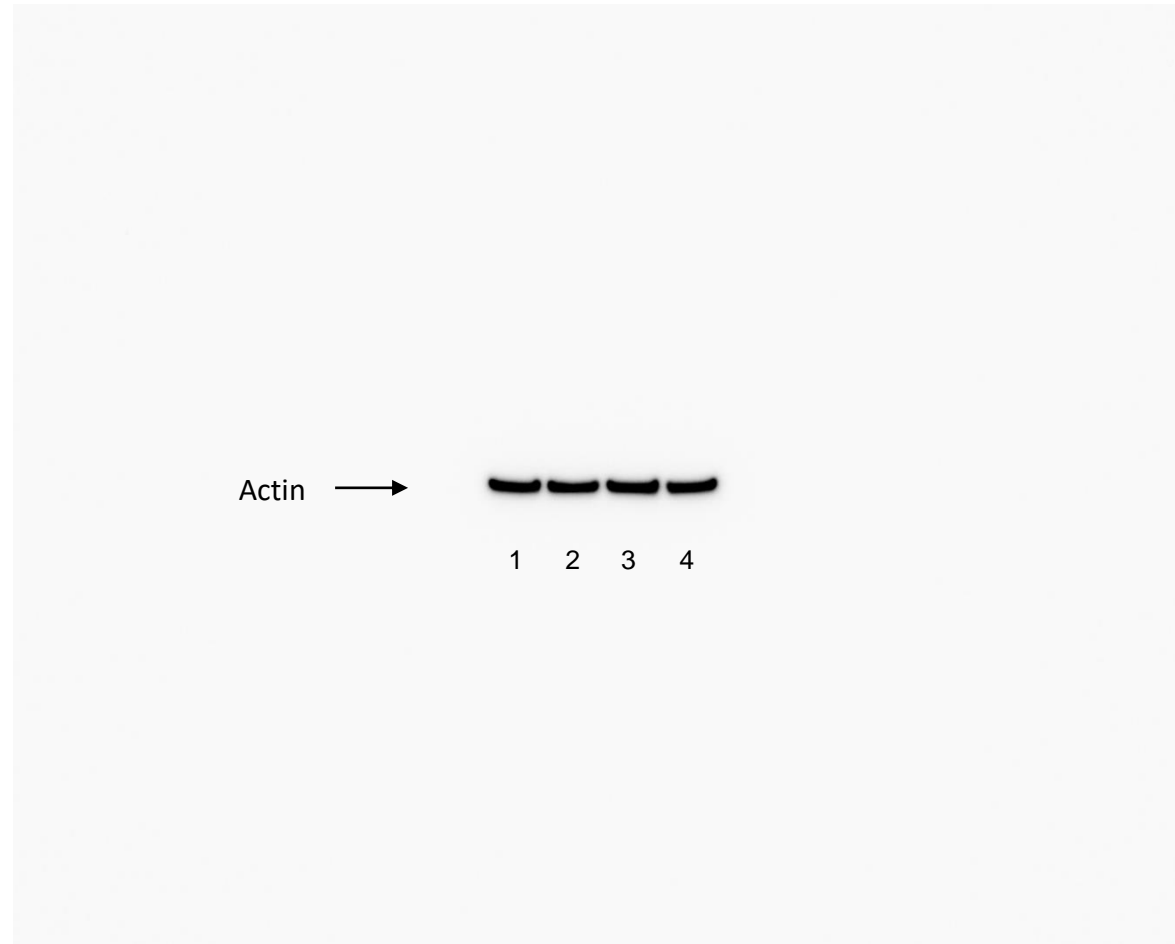

Supplement: 41419_2022_4767_MOESM2_ESM.pdf [file 41419_2022_4767_MOESM2_ESM.pdf]
