# Supplementary material for: The nuclear receptor REV-ERBα is implicated in the alteration of β-cell autophagy and survival under diabetogenic conditions
Source: PubMed Central journal article supplement (PMC9012816; doi:10.1038/s41419-022-04767-z), 2022-04-15
Supplement: 41419_2022_4767_MOESM1_ESM.pdf [file 41419_2022_4767_MOESM1_ESM.pdf]

**A**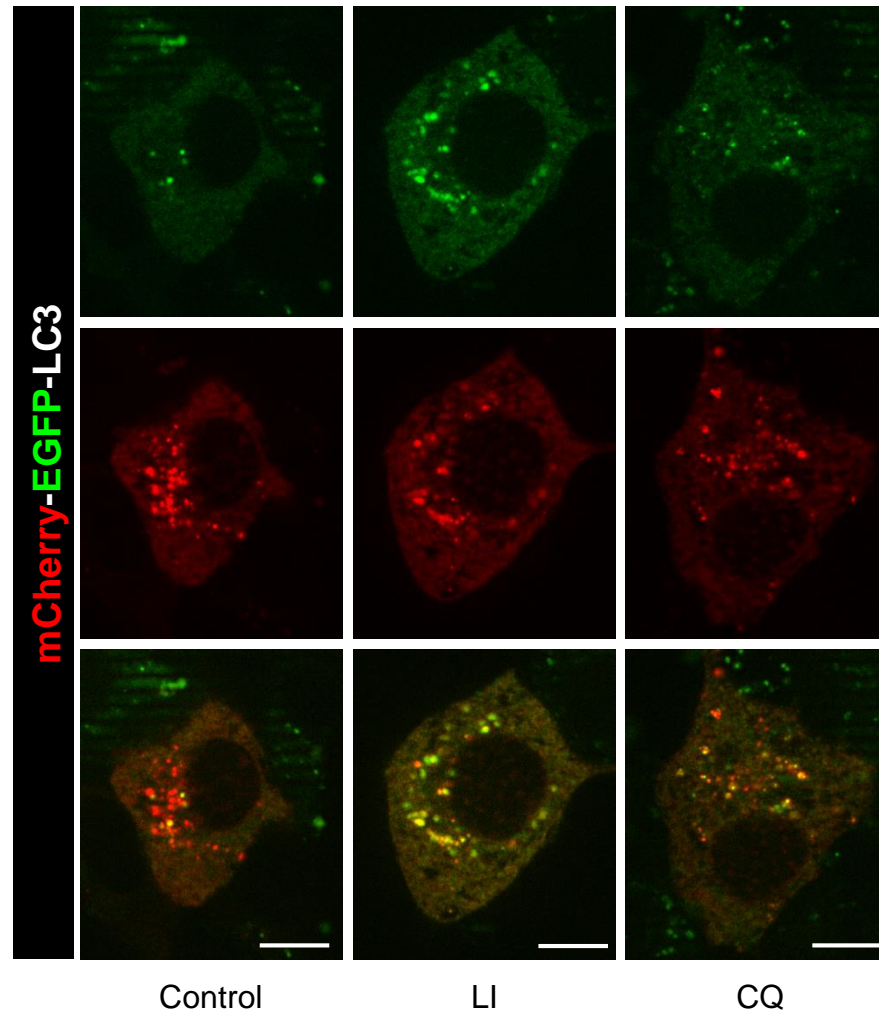**B**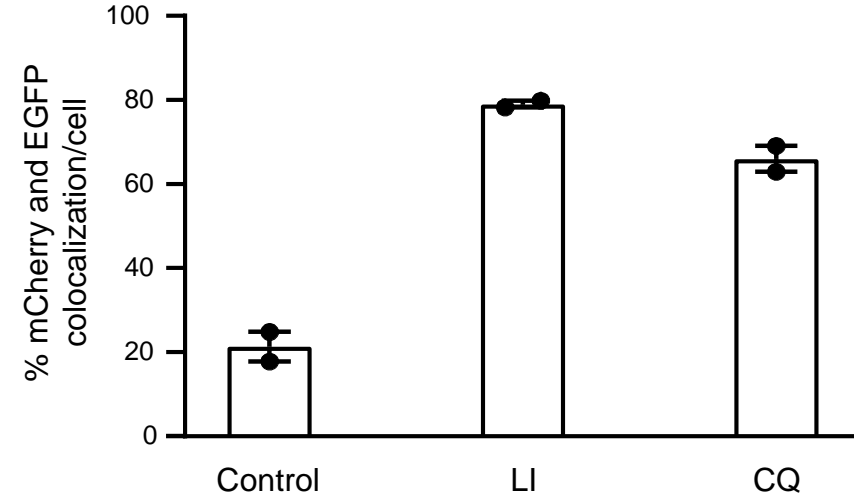

**Supplemental Figure 1. Validation of mCherry-EGFP-LC3 reporter system in  $\beta$ -cells.**

**A:** INS-1E cells expressing mCherry-EGFP-LC3B plasmid were either cultured in the absence or presence of lysosomal inhibitors (LI: E-64-d, 10  $\mu$ g/ml and pepstatin A, 10  $\mu$ g/ml, 24 h), or chloroquine (CQ: 100  $\mu$ M, 2 h). **B:** Autophagic flux was assessed by quantification of mCherry and EGFP puncta colocalization using Image J software. Results are expressed as percentage of mCherry and EGFP colocalization per cell. Data are expressed as mean  $\pm$  SEM of two independent experiments. Scale bar: 5  $\mu$ m

**A**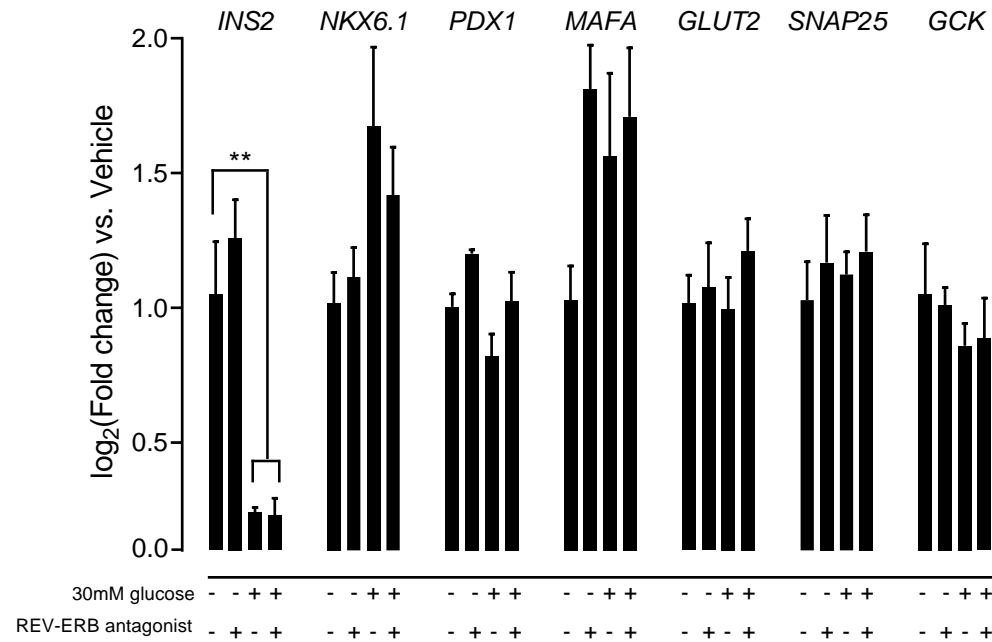**B**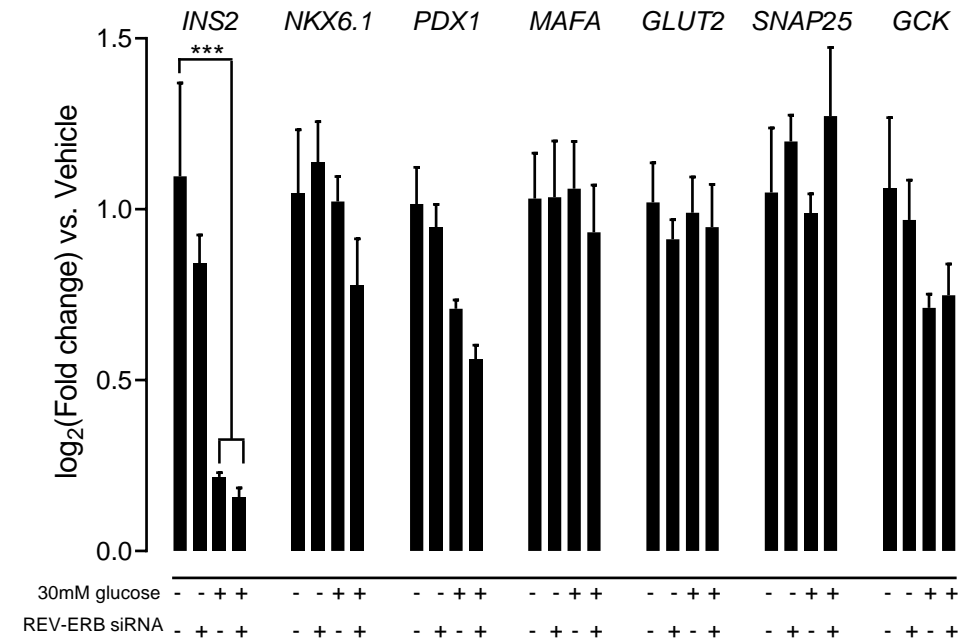

**Supplemental Figure 2: Role of REV-ERB $\alpha$  silencing or inhibition on  $\beta$ -cell function and identity gene expression under glucotoxic conditions.**

**A:** INS-1E cells were exposed to glucotoxicity [30 mM glucose (G30) vs. control 11 mM glucose (G11)] for 48 h in the presence or absence of REV-ERB antagonist (SR8279, 10  $\mu$ M). **B:** REV-ERB $\alpha$  was silenced in INS-1E cells by siRNA. Scramble RNA (-) was used as control. Cells were then exposed to glucotoxicity for 48 h (G30 vs. G11). For **A** and **B**, mRNA expression of key  $\beta$ -cell identity and functional genes is plotted and expressed as fold change relative to control expression (n=4 independent experiments per condition). Data are expressed as mean  $\pm$  SEM; \*\*P<0.01, \*\*\*P<0.001

| Gene Target (Rat)     | Sequence (F=forward; R=reverse) |
|-----------------------|---------------------------------|
| <i>Ins2</i>           | F-ATCCTCTGGGAGCCCCGC            |
|                       | R-AGAGAGCTTCCACCAAG             |
| <i>Nkx6.1</i>         | F-CAGGTCAAGGTCTGGTTCCA          |
|                       | TCAGTCTCCGAGTCCTGCT             |
| <i>Pdx1</i>           | F-GAACCGGAGGAGAATAAGAGG         |
|                       | R-AGTCAAGTTGAGCATCACTGC         |
| <i>Mafa</i>           | F-AGGAGGTCATCCGACTGAAACA        |
|                       | R-GCGTAGCCGCGTTCTT              |
| <i>Glut2 (Slc2a2)</i> | F-CGGAACCTTGGCTTTCAGTGTCTT      |
|                       | R-GGTGCATTGATCACACCGATGTCA      |
| <i>Snap25</i>         | F-GAGTCCCTGGAAAGCACC            |
|                       | R-GGCATCGTTTGTACCCT             |
| <i>Gck</i>            | F-AAGCCGCAGTGAGGACGTGATG        |
|                       | R-AGGTGATTTTCGCAGTTGGGTGCA      |
| <i>Actin</i>          | F-CTCCTAGCACCATGAAGATC          |
|                       | R-TCATCGTACTCCTGCTTGC           |

**Supplemental Table 1: Gene Specific Primers**
